1                   **Anaerobic degradation of syringic acid by an adapted strain of**  
2                                   *Rhodopseudomonas palustris*

3  
4  
5   J. Zachary Oshlag,<sup>1,2</sup> Yanjun Ma,<sup>1</sup> Kaitlin Morse,<sup>1</sup> Brian T. Burger,<sup>1</sup> Rachelle A. Lemke,<sup>1</sup> Steven  
6   D. Karlen,<sup>1,3</sup> Kevin S. Myers,<sup>1</sup> Timothy J. Donohue,<sup>1,4</sup> and Daniel R. Noguera<sup>1,2</sup>

7  
8   <sup>1</sup>Great Lakes Bioenergy Research Center, Wisconsin Energy Institute, University of Wisconsin,  
9   Madison WI 53726

10   <sup>2</sup>Department of Civil & Environmental Engineering, University of Wisconsin, Madison, WI  
11   53706

12   <sup>3</sup>Department of Biochemistry, University of Wisconsin, Madison, WI 53706

13   <sup>4</sup>Department of Bacteriology, University of Wisconsin, Madison, WI 53706

14  
15   Corresponding author: Daniel R. Noguera (dnoguera@wisc.edu)

18 **ABSTRACT**

19 While lignin represents a major fraction of the carbon in plant biomass, biological strategies to  
20 convert the components of this heterogenous polymer into products of industrial and  
21 biotechnological value are lacking. Syringic acid (3,5-dimethoxy-4-hydroxybenzoic acid) is a  
22 byproduct of lignin degradation, appearing in lignocellulosic hydrolysates, deconstructed lignin  
23 streams, and other agricultural products. *Rhodospseudomonas palustris* CGA009 is a known  
24 degrader of phenolic compounds under photoheterotrophic conditions, via the benzoyl-CoA  
25 degradation (BAD) pathway. However, *R. palustris* CGA009 is reported to be unable to  
26 metabolize *meta*-methoxylated phenolics such as syringic acid. We isolated a strain of *R. palustris*  
27 (strain SA008.1.07), adapted from CGA009, which can grow on syringic acid under  
28 photoheterotrophic conditions, utilizing it as a sole source of organic carbon and reducing power.  
29 An SA008.1.07 mutant with an inactive benzoyl-CoA reductase structural gene was able to grow  
30 on syringic acid, demonstrating that the metabolism of this aromatic compound is not through the  
31 BAD pathway. Comparative gene expression analyses of SA008.1.07 implicated the involvement  
32 of products of the *vanARB* operon (*rpa3619-rpa3621*), which has been described as catalyzing  
33 aerobic aromatic ring demethylation in other bacteria, in anaerobic syringic acid degradation. In  
34 addition, experiments with a *vanARB* deletion mutant demonstrated the involvement of the  
35 *vanARB* operon in anaerobic syringic acid degradation. These observations provide new insights  
36 into the anaerobic degradation of *meta*-methoxylated and other aromatics by *R. palustris*.

37 **IMPORTANCE**

38 Lignin is the most abundant aromatic polymer on Earth and a resource that could eventually  
39 substitute for fossil fuels as a source of aromatic compounds for industrial and biotechnological  
40 applications. Engineering microorganisms for production of aromatic-based biochemicals requires

41 detailed knowledge of metabolic pathways for the degradation of aromatics that are present in  
42 lignin. Our isolation and analysis of a *Rhodopseudomonas palustris* strain capable of syringic acid  
43 degradation reveals a previously unknown metabolic route for aromatic degradation in *R. palustris*.  
44 This study highlights several key features of this pathway and sets the stage for a more complete  
45 understanding of the microbial metabolic repertoire to metabolize aromatic compounds from lignin  
46 and other renewable sources.

## 47 **INTRODUCTION**

48 As one of the major biopolymers present in plant tissues, lignin has the potential to serve as a  
49 renewable source of carbon for the bio-based production of compounds that are currently derived  
50 from petroleum. Unfortunately, the ability to derive chemicals of commercial, chemical, or  
51 medicinal value from lignin is limited by information needed to improve the biological conversion  
52 of the aromatics in lignin into valuable products. We are interested in improving our understanding  
53 of how bacteria metabolize the aromatic building blocks in lignin and using this information to  
54 develop strategies that allow the conversion of this major component of plant cell walls into  
55 valuable products.

56 Syringic acid, along with other *meta*-methoxy substituted phenolic compounds are plant-derived  
57 aromatics that present both a hindrance and a potential source of value to the chemical, fuel, and  
58 biotechnology industries (1-3). Originating from the guaiacyl (coniferyl alcohol) and syringyl  
59 (sinapyl alcohol) phenylpropanoids that are polymerized into lignin during secondary cell wall  
60 formation (1), *meta*-methoxylated aromatics are frequently present in products generated from  
61 deconstructed biomass (4). While present at low concentrations in sugar-rich lignocellulosic  
62 hydrolysates, these methoxylated aromatics can nonetheless induce stress responses (2, 5) and  
63 cause toxicity (6, 7) in non-aromatic degrading microbes, leading to a decrease in both microbial

64 growth and biofuel yield during fermentation (8, 9). Further, these phenolics are present at much  
65 higher concentrations in solubilized lignin streams produced with emerging technologies (10-13).  
66 Incorporation of *meta*-methoxylated aromatics into the metabolism of an appropriate, genetically  
67 tractable microorganism could provide a promising and efficient route for monolignol valorization  
68 through the identification and optimization of the biochemical pathways involved.

69 To expand the ability of microbes to metabolize syringic acid and related plant-derived aromatic  
70 compounds, we are studying *Rhodospseudomonas palustris*, a metabolically versatile, well-  
71 characterized, and genetically tractable purple non-sulfur  $\alpha$ -proteobacterium (14-16) that has a  
72 proven and well understood ability to utilize aromatic monomers (17, 18). Under anaerobic  
73 conditions, *R. palustris* uses the benzoyl-CoA degradation (BAD) pathway to cleave the aromatic  
74 ring of mono-aromatic compounds after activation of the molecule via coenzyme-A ligation (19).  
75 The diversity of aromatic compounds that *R. palustris* can degrade depends on the existence of  
76 accessory pathways that transform aromatic monomers to the common BAD pathway  
77 intermediates benzoyl-CoA or 4-hydroxybenzoyl-CoA (20, 21). In addition, previous studies have  
78 shown that growth of *R. palustris* in lignocellulosic hydrolysates that contain a mixture of plant-  
79 derived organic compounds allows for the degradation of aromatic monomers that do not support  
80 growth when supplied as the sole carbon source in defined media (21).

81 Here we describe studies aimed at understanding the metabolism of syringic acid by an adapted *R.*  
82 *palustris* strain. By supplying syringic acid to a series of successive cultures, we isolated a strain  
83 of *R. palustris* capable of utilizing this *meta*-methoxylated aromatic as the sole source of organic  
84 carbon. We analyze the degradation of syringic acid by this adapted isolate, *R. palustris*  
85 SA008.1.07, in defined laboratory media to provide insight into the mechanisms involved in the  
86 degradation of this aromatic monomer.

## 87 MATERIALS AND METHODS

88 **Media.** All *R. palustris* strains were grown in PM medium (22), brought to pH 7 with sodium  
89 hydroxide, and sterilized by filtration. PM media with different organic carbon sources were  
90 prepared; PM-AcY contained 20 mM sodium acetate and 0.1% yeast extract, PM-succinate  
91 contained 10 mM succinic acid, PM-aromatic was made with 3 to 3.5 mM aromatic compounds  
92 (unless otherwise indicated), and supplemented with 30 mM sodium bicarbonate. *Escherichia coli*  
93 strains were grown on LB medium (23). Molecular genetics-grade agar (Fisher Scientific, Fair  
94 Lawn, NJ) was added to media at 1.5% to solidify, where noted. When necessary, the following  
95 reagents were used for cloning, selection, and propagation of modified strains: sucrose 10% (w/v),  
96 kanamycin (Kn) 50 µg/mL, ampicillin 25 µg/mL, gentamycin 20 µg/mL. All chemicals for media  
97 preparation were obtained from Fisher Scientific (Hampton, NH) or Sigma-Aldrich (St. Louis,  
98 MO) at purities suitable for molecular biology.

99 **Strains and Plasmids.** The *E. coli* and *R. palustris* strains and plasmids used in this study are  
100 summarized in Table 1.

101 **Growth Conditions.** To culture *R. palustris*, cells were streaked from glycerol freezer stocks onto  
102 PM-AcY-agar plates and incubated aerobically at 30 °C to obtain single colonies. A colony was  
103 transferred to 25 ml PM-AcY liquid media and grown aerobically at 30 °C. Aliquots (about 170  
104 µl) from this aerobic culture were added to clear glass culture tubes (16×125 mm) containing PM-  
105 succinate, which were completely filled to the brim with media, sealed with a rubber septum, and  
106 incubated. Since the growing culture rapidly exhausts any oxygen available in the medium, this  
107 culturing technique has been demonstrated to efficiently create anaerobic culturing conditions in  
108 liquid media (24). Photoheterotrophic growth was maintained at 30 °C under illumination by  
109 incandescent tungsten lamps at ~10 W/m<sup>2</sup> and kept well mixed by a micro magnetic stir bar (3×10

110 mm). These photoheterotrophic PM-succinate cultures were used as inocula for  
111 photoheterotrophic experiments with the aromatic substrates, which were prepared following the  
112 procedure described above to generate anaerobic conditions in liquid media. *R. palustris* growth  
113 in liquid cultures was monitored using a Klett-Summerson photoelectric colorimeter (Klett MFG  
114 Co., New York, NY). Photoheterotrophic growth on solid media was achieved by placing plates  
115 in a sealed canister containing a GasPak™ Ez Anaerobe Container System (BD Biosciences,  
116 Franklin Lakes, NJ), which was placed under constant illumination and rotated daily.

117 **Analytical tests.** For chemical analysis, samples were taken periodically by aseptically piercing a  
118 rubber septum and withdrawing 200 µL of liquid culture. Following sampling, the headspace of  
119 cultures was flushed with argon gas. Samples were passed through 0.22 µm PVDF membranes  
120 (Merck, KGaA, Darmstadt, Germany) to separate cells from media, and the filtrates were frozen  
121 at -80 °C until analysis.

122 Aromatic compounds were quantified by high performance liquid chromatography (HPLC) using  
123 an LC-10AT<sub>VP</sub> solvent delivery module HPLC system (Shimadzu, Kyoto, Japan) with an SPD-  
124 M10A<sub>VP</sub> diode array detector (Shimadzu, Kyoto, Japan). Samples were prepared as described  
125 elsewhere (25). Aromatic compounds were separated using a C18-reversed stationary phase  
126 column and an isocratic aqueous mobile phase of methanol (30% [wt/vol]), acetonitrile (6%  
127 [wt/vol]), and 5 mM formic acid in water (64% [wt/vol]) at a flow rate of 0.8 ml min<sup>-1</sup> (25).  
128 Aromatics and metabolic by-products were quantified using standard curves and UV absorbance.  
129 Standard curves were prepared using commercially purchased compounds (Sigma-Aldrich, St.  
130 Louis, MO) dissolved in dimethyl sulfoxide (DMSO).

131 Liquid chromatography tandem-mass spectrometry (LC-MS/MS) was used for identification of  
132 extracellular metabolic by-products, using a chromatography separation system similar to the one

133 described above. Mass spectra were analyzed with a Thermo Q-exactive mass spectrometer  
134 (Thermo Scientific, Waltham, MA). Standards were directly infused into the mass spectrometer.  
135 Spectra were acquired in positive ionization mode with an MS/MS resolution of 17,500, isolation  
136 width 2.0 Da, and normalized collision energy 30%.

137 Nuclear Magnetic Resonance (NMR) was also used for identification of some metabolic by-  
138 products. For these tests, three consecutive 100-mL ethyl acetate (EtOAc) extractions were  
139 performed on 500 mL of spent medium at pH 6.5-7.0. The pH of the aqueous fraction was then  
140 lowered to ~1 using 1 M hydrochloric acid. Additional organic compounds were extracted from  
141 this acidified aqueous fraction using three consecutive 100-mL dichloromethane (DCM)  
142 extractions. Both extractants were independently washed three times with saturated sodium  
143 bicarbonate (50 mL/extraction), then twice with saturated sodium chloride (50 mL/extraction), and  
144 then dried with sodium sulfate. Samples were filtered and the solvent was evaporated. NMR  
145 spectra of the extracted compounds were collected in acetone-*d*<sub>6</sub> on a Bruker AVANCE 500 MHz  
146 spectrometer (Billerica, MA, USA) fitted with a cryogenically-cooled 5-mm QCI  
147 (1H/31P/13C/15N) gradient probe with inverse geometry (proton coils closest to the sample).  
148 Spectra were compared to high purity standards from Sigma-Aldrich (St. Louis, MO).

149 Chemical Oxygen Demand (COD) was used to quantify soluble organic compounds and biomass  
150 (25), with measurements on both filtered and unfiltered samples. The theoretical COD values for  
151 various carbon sources used in this study are as follows (in mg of COD/mmol of substrate): benzoic  
152 acid 240, 4-hydroxybenzoic acid (4-HBA) 224; syringic acid 288.

153 **Transcriptomic analysis (RNA-seq).** For transcriptomic analyses, *R. palustris* SA008.1.07  
154 cultures were photoheterotrophically grown on PM-4-HBA, PM-syringic acid, or PM-succinate  
155 by bubbling with 95% N<sub>2</sub> and 5% CO<sub>2</sub> under constant illumination at 30°C to mid-log phase when

156 RNA was harvested (26). For each sample, rRNA was reduced (Ribo-Zero kit, Illumina), and a  
157 strand-specific library was prepared (TruSeq Stranded Total RNA Sample Prep Kit, Illumina).  
158 RNA from cultures grown on PM-4-HBA and PM-syringic acid was processed and sequenced at  
159 the University of Wisconsin-Madison Biotechnology Center (Illumina HiSeq2500, 1x100 bp,  
160 single end). RNA from cultures grown on PM-succinate was processed and sequenced at the U.S.  
161 Department of Energy Joint Genome Institute (Illumina NextSeq, 2x151 bp, paired end). Three  
162 biological replicates were analyzed per growth condition. The paired-end FASTQ files were split  
163 into read 1 (R1) and read 2 (R2) files and R1 files were retained for further analysis as the other  
164 data contained only single-end reads. All FASTQ files were processed through the same pipeline.  
165 Reads were trimmed using Trimmomatic version 0.3 (27) with the default settings except for a  
166 HEADCROP of 5, LEADING of 3, TRAILING of 3, SLIDINGWINDOW of 3:30, and MINLEN  
167 of 36. After trimming, the reads were aligned to the *R. palustris* CGA009 genome sequence  
168 (GenBank assembly accession GCA\_000195775.1) using Bowtie2 version 2.2.2 (28) with default  
169 settings except the number of mismatches allowed was set to 1. Aligned reads were mapped to  
170 gene locations using HTSeq version 0.6.0 (29) using default settings except for the “reverse”  
171 strandedness argument was used. DESeq2 version 1.22.2 (30) was used to identify significantly  
172 differentially expressed genes from pairwise analyses, using a Benjamini and Hochberg (31) false  
173 discovery rate (FDR) less than 0.05 as a significance threshold and/or a fold change greater than  
174 two. Raw sequencing reads were normalized using the reads per kilobase per million mapped reads  
175 (RPKM). A full list of gene transcripts normalized by RPKM is shown in Table S1. The accession  
176 number for the RNA-seq data in the Gene Expression Omnibus (GEO) database is GSE135630.  
177 **Genome sequencing.** Genomic DNA of CGA009, SA008.1.07 and 16 other adapted strains which  
178 were capable of anaerobic degradation of syringic acid was isolated and purified (32). Genome



179 sequencing was performed and analyzed by the U.S. Department of Energy Joint Genome Institute  
180 on an Illumina NovaSeq (2 x151 bp). The resulting DNA reads were aligned to the *R. palustris*  
181 CGA009 genome (NC005296) using the short read alignment tool BWA (33). SNPs and small  
182 INDELs were called using samtools mpileup and bcftools then filtered using vcfutils.pl from the  
183 samtools package (34). The NCBI accession numbers for sequences are PRJNA520130-  
184 PRJNA520144, PRJNA537839, and PRJNA537840.

185 **DNA manipulation.** Purification of PCR products was achieved using the QIAquick PCR  
186 purification kit (Qiagen, Hilden, GER) and PCR products were extracted and purified from agarose  
187 gels using the Zymoclean Gel DNA Recovery Kit (Zymo Research, Irvine, CA). The Zyppy  
188 Plasmid Miniprep Kit (Zymo Research) was used to purify plasmid DNA. Sanger-based  
189 sequencing reactions using BigDye v3.1 (Applied Biosystems, Foster City, CA) were processed  
190 by the University of Wisconsin-Madison Biotechnology Center DNA Sequence Facility.

191 **Creation of mutants.** A fragment of DNA containing *badE* and ~1.2-kbp flanking DNA up- and  
192 downstream of *badE* was PCR amplified, digested with HindIII and BamHI, and ligated into  
193 pSUP202 to create pS202badDEF. The *badE* coding region, 350-bp of the 3' end of *badD*, and  
194 350-bp of the 5' end of *badF* were deleted from pS202badE by PCR with phosphorylated primers.  
195 The resulting PCR product was ligated to an  $\Omega$ Kn<sup>R</sup> cassette (35) to create pS202 $\Delta$ badE.  
196 pS202 $\Delta$ badE was mobilized into *R. palustris* strains CGA009 and SA008.1.07 via conjugation  
197 with *E. coli* S17-1. Double crossovers were screened for Kn resistance and ampicillin sensitivity.  
198 The presence of the desired *bad* mutations was confirmed by sequencing the appropriate genomic  
199 region.

200 An in-frame, markerless deletion of *hbaB* was constructed using the suicide vector pK18mobsacB  
201 (36). Briefly, *hbaB* and ~0.8-kbp flanking DNA up- and downstream of *hbaB* was PCR amplified

202 from *R. palustris* genomic DNA, digested with XbaI and HindIII, and ligated into pK18mobsacB  
203 to generate pK18hbaB. The *hbaB* coding region was deleted from pK18hbaB by PCR with  
204 phosphorylated primers. The resulting PCR product was circularized by ligation to generate  
205 pK18 $\Delta$ hbaB and transformed into *E. coli* DH5 $\alpha$ . pK18 $\Delta$ hbaB was introduced into *R. palustris*  
206 strains CGA009 and SA008.1.07 by electroporation. Double crossovers were screened for ability  
207 to grow on PM-AcY medium with 10% sucrose and Kn sensitivity. The presence of the desired  
208 *hbaB* mutation was confirmed by sequencing the appropriate genomic region.

209 An in-frame, markerless deletion of *vanARB* was constructed in SA008.1.07 using the suicide  
210 vector pK18mobsacB (36). Briefly, ~1.5-kbp up- and downstream flanking regions of *vanARB*  
211 were PCR amplified from SA008.1.07 genomic DNA and assembled into pK18mobsacB using the  
212 NEBuilder HiFi DNA Assembly Master Mix (New England Biolabs, Ipswich, MA) to create  
213 pK $\Delta$ vanARB. Generation and confirmation of the *vanARB* mutant (SA $\Delta$ van) using pK $\Delta$ vanARB  
214 was performed as described above. To generate plasmid pBRvan, a DNA fragment containing the  
215 *vanARB* operon was PCR amplified from SA008.1.07 genomic DNA, assembled into the  
216 pBBR1MCS-5 vector (37) using the NEBuilder HiFi DNA Assembly Master Mix, and  
217 transformed into NEB 5- $\alpha$  *E. coli*. After the construction of plasmid pBRvan was confirmed  
218 by DNA sequencing, it was introduced into *R. palustris* strains SA008.1.07 and SA $\Delta$ van by  
219 electroporation. In the same manner, plasmid pBRvanAB was constructed by assembly of  
220 pBBR1MCS-5 vector with *vanA* and *vanB* genes amplified from SA008.1.07 genomic DNA,  
221 confirmed and transformed to SA $\Delta$ van. Transformants were selected on PM-AcY gentamycin  
222 plates and confirmed by PCR and DNA sequencing. Gentamycin was added to maintain pBRvan  
223 and pBRvanAB.

224 In-frame, markerless deletions of *rpa2160*, *rpa4286* and *rpa1972* in SA008.1.07, and *rpa1972* in  
225 CGA009 were created in the same manner as SA $\Delta$ van, creating strains SA $\Delta$ 2160, SA $\Delta$ 4286,  
226 SA $\Delta$ 1972, and A9 $\Delta$ 1972, respectively. Primers used for generating gene deletion and expression  
227 mutants are shown in Table S2.

## 228 **RESULTS AND DISCUSSION**

229 **Isolation of a syringic acid degrading *R. palustris* strain.** *R. palustris* CGA009 is reported as  
230 being unable to grow photoheterotrophically with syringic acid as the sole organic carbon source  
231 (14). To explore the potential for *R. palustris* to evolve the capacity to degrade syringic acid, we  
232 established a series of anaerobic cultures in which CGA009 were provided with a combination of  
233 syringic acid, benzoic acid, and 4-HBA, the latter two being established growth substrates for this  
234 strain (22, 38). Cultures were kept under illumination and anaerobic conditions for at least one  
235 week after growth had reached stationary phase. At the conclusion of each growth phase,  
236 extracellular samples from each culture were assayed for the presence of aromatic acids. Cultures  
237 showing some decrease in extracellular syringic acid concentration were used as an inoculum for  
238 new cultures containing an equal or higher proportion of syringic acid in the medium (Figure 1).  
239 This process was iterated five times with increases in the proportion of syringic acid in the media,  
240 until cells were growing on media in which syringic acid represented 80% of the organic carbon  
241 added (measured as COD). The highest performing culture at this stage, as determined by total  
242 syringic acid consumption from the media (culture 5.14 in Figure 1), was plated  
243 photoheterotrophically onto solid media containing this compound as the sole source of organic  
244 carbon, and fourteen colonies were picked after two weeks of incubation. The isolated colonies  
245 were then used to inoculate separate liquid photoheterotrophic cultures containing syringic acid as  
246 the sole source of organic carbon, the highest performing of which were used as incubations for a

247 second round of liquid photoheterotrophic growth on medium containing syringic acid as the sole  
248 organic carbon source. From a second anaerobic plating (from culture 7.07 in Figure 1), twelve  
249 colonies were obtained. To further test that these cells acquired the ability to grow solely on  
250 syringic acid, cells in isolated colonies were first grown photoheterotrophic on succinate and then  
251 subcultured to a medium containing syringic acid as the sole photoheterotrophic carbon source.  
252 The isolate that degraded the most syringic acid under photoheterotrophic conditions (Figure 2),  
253 hereafter referred to as strain SA008.1.07, was selected for further testing.

254 **Identification of 3,5-dimethoxy-1,4-benzoquinone (DMBQ) as a compound that accumulates**  
255 **extracellularly during growth on syringic acid by SA008.1.07.** We found that when SA008.1.07  
256 used syringic acid as a sole source of organic carbon under anaerobic, photoheterotrophic  
257 conditions (Figure 3), an orange-yellow tint appeared during early stages of culture growth.  
258 However, as growth progressed, the color of the culture became dark and distinguishable from the  
259 deep-red color of the accumulating biomass.

260 HPLC analysis of the media before and after growth of SA008.1.07 revealed the accumulation of  
261 a light-absorbing unknown product that eluted at 8.4 min (Figure 4A). By analyzing standards of  
262 aromatics that are known or potential syringic-acid degradation by-products (5-hydroxyvanillic  
263 acid, vanillic acid, protocatechuic acid) by HPLC, we determined that none of these compounds  
264 were found at detectable levels in supernatants from SA008.1.07 cultures. An LC-MS/MS  
265 examination of the extracellular unknown indicated an m/z ratio of 169.05 (Figure 4B). For further  
266 analysis of this unknown, an extractive procedure was performed on the medium, partitioning the  
267 compounds into EtOAc or DCM (See Materials and Methods), and both fractions were analyzed  
268 by NMR. Syringic acid was identified as the major product in the  $^1\text{H}$  NMR of the DCM extract,  
269 based both on its spectrum and a comparison to that of a commercially purchased standard (Figure

270 4E). The  $^1\text{H}$  NMR of the EtOAc extract (Figure 4E) contained two major peaks, indicative of  
271 methoxy groups and hydrogen atoms on an aromatic ring. Neither of these signals were split,  
272 indicating a lack of coupling to adjacent hydrogen atoms in the compound. The predicted  
273 molecular weight of the unknown (~168.05 based on the positive ionization MS spectrum) and the  
274  $^1\text{H}$  NMR pattern suggested that 3,5-dimethoxy-1,4-benzoquinone (DMBQ) was the compound that  
275 accumulated during growth on syringic acid. Indeed, NMR (Figure 4E) and MS analysis (Figure  
276 4D) of a commercial DMBQ standard, which also has an orange-yellow tint (CAS number 530-  
277 55-2) was indistinguishable from that of the extracellular product that accumulates when  
278 SA008.1.07 is grown on syringic acid.

279 **DMBQ inhibits growth of *R. palustris* SA008.1.07.** Since syringic acid was not totally degraded  
280 in the SA008.1.07 cultures (Figure 3), we investigated whether the presence of DMBQ affected  
281 syringic acid metabolism by this strain. In one test of this hypothesis, we analyzed  
282 photoheterotrophic growth of SA008.1.07 in cultures containing 3 mM syringic acid and varying  
283 concentrations of DMBQ (Figure 5). When the initial DMBQ concentration was 0.15 mM or  
284 above, we observed complete inhibition of growth (as scored by cell density) and of syringic acid  
285 degradation (Figure 5). In experiments with initial DMBQ concentrations of less than 0.15 mM,  
286 growth and syringic acid degradation occurred, and extracellular DMBQ concentrations increased  
287 to about 0.19 mM. Thus, the results of this experiment suggested that, at the range of  
288 concentrations tested, DMBQ had an inhibitory effect on syringic acid degradation and cell  
289 growth. The inhibitory effect increased as the DMBQ concentration increased, suggesting that the  
290 buildup of DMBQ in media containing syringic acid can prevent its total degradation by  
291 SA008.1.07. To test this hypothesis, we added 0.3 mM DMBQ (a concentration that approximates  
292 the amount found in stationary phase syringic-acid grown cultures) to an SA008.1.07 culture when

293 growth on syringic acid was detected (Figure S1). We found that the addition of 0.3 mM DMBQ  
294 arrested growth and blocked further syringic acid degradation in this culture when compared a  
295 control not receiving any added DMBQ.

296 To test whether the negative impact of DMBQ on growth was seen in cells grown in the presence  
297 of other aromatic substrates, we tested its effects on photoheterotrophic cultures grown on  
298 equimolar amounts of benzoic acid and 4-HBA. In this case, we found that addition of 0.3 mM  
299 DMBQ to growing SA008.1.07 cultures reduced the rates of growth and of aromatic degradation  
300 compared to a control not receiving DMBQ (Figure S2). However, the extracellular DMBQ  
301 concentrations decreased in these cultures, suggesting a slow rate of DMBQ degradation that was  
302 not evident in experiments with syringic acid. To test the effect of DMBQ on cells growing on a  
303 non-aromatic substrate, SA008.1.07 was grown on succinate with varying concentrations of  
304 DMBQ (Figure S3). In this case, a lag phase was observed when DMBQ concentrations were 0.06  
305 and 0.3 mM, and complete growth inhibition observed at 0.6 mM. There is also apparent  
306 degradation of DMBQ in these cultures (Figure S3). These results indicate that the inhibitory effect  
307 of DMBQ on growth or substrate utilization is not specific to cells that are using syringic acid as  
308 a sole organic carbon source. However, the inhibitory effect of exogenous DMBQ was more  
309 pronounced in cultures growing on aromatic substrates than when using succinate as an organic  
310 carbon source. Furthermore, the evidence obtained with these experiments is not sufficient to  
311 determine the source of DMBQ. For instance, a benzoquinone has been described as a toxic  
312 intermediate in the degradation pathway of pentachlorophenol by *Sphingobium chlorophenicum*  
313 (39). The decrease in DMBQ concentration observed in experiments with 4-HBA and succinate  
314 could be a result of either DMBQ being slowly degraded, or reacting with cellular components as  
315 described for tetrachlorobenzoquinone in *S. chlorophenicum* (39).

316 **Syringic acid degradation by *R. palustris* SA008.1.07 does not require the BAD pathway.** To  
317 date, the only known route for photoheterotrophic degradation of aromatic compounds in *R.*  
318 *palustris* is through the BAD pathway (19) (Figure S4). To examine the role of the BAD pathway  
319 in syringic acid degradation by SA008.1.07, we created SA $\Delta$ badE, a mutant of this adapted strain  
320 lacking the benzoyl-CoA reductase gene. This deletion is sufficient to block anaerobic degradation  
321 of all tested aromatic substrates in wild type *R. palustris* CGA009 (19). We found that the  
322 SA $\Delta$ badE mutant strain lacks the ability to consume benzoic acid or 4-HBA, as expected (Table  
323 2). However, we also found that SA $\Delta$ badE grew on syringic acid, exhibiting a similar behavior to  
324 that of the parent strain SA008.1.07 (Figure 6). We also examined the role of the peripheral HBA  
325 pathway, responsible for conversion of 4-HBA into benzoyl-CoA (Figure S4), in the growth of  
326 strain SA008.1.07 on syringic acid. To do this, we created SA $\Delta$ hbaB, a mutant of SA008.1.07  
327 which lacks the 4-hydroxybenzoyl-CoA reductase gene that is known to be required for 4-HBA  
328 metabolism in *R. palustris* CGA009 (40). As expected, we found that the SA $\Delta$ hbaB mutant lacks  
329 the ability to degrade 4-HBA, yet it can degrade benzoic acid (Table 2). As with the SA $\Delta$ badE  
330 mutant, we found that SA $\Delta$ hbaB maintained the ability to grow on and degrade syringic acid  
331 (Figure 6).

332 From these experiments, we conclude that neither the peripheral HBA pathway, nor the BAD  
333 pathway is required for the degradation of syringic acid by *R. palustris* SA008.1.07. This was a  
334 surprising result because the BAD pathway is the only known route for anaerobic aromatic  
335 metabolism in *R. palustris* (16, 19).

336 **Growth on syringic acid does not induce expression of BAD pathways in *R. palustris***  
337 **SA008.1.07.** We used RNA-seq to compare global changes in transcript levels in cultures of  
338 SA008.1.07 grown on syringic acid, 4-HBA, and succinate (Table S1). Comparing growth on 4-

339 HBA to growth on succinate revealed the expected increase in transcript abundance of genes  
340 involved in the BAD pathway and the peripheral HBA pathway (Table 3). This is consistent with  
341 the above finding that SA008.1.07 uses the BAD pathway for 4-HBA metabolism (18). However,  
342 the abundance of transcripts from these genes was much lower and mostly not significantly  
343 differentially expressed ( $p > 0.05$ ) when comparing growth of SA008.1.07 on syringic acid and  
344 succinate (Table 3). Therefore, in addition to SA008.1.07 not needing the BAD and HBA pathways  
345 for growth on syringic acid (Figure 6), the transcriptomics data show that growth in the presence  
346 of syringic acid does not induce expression of known genes within the BAD and HBA pathways.

347 **Identification of a gene cluster required for syringic acid degradation by *R. palustris***  
348 **SA008.1.07.** The global gene expression analysis was also used to identify genes with increased  
349 transcript abundance when SA008.1.07 was grown on syringic acid compared to either 4-HBA or  
350 succinate (Table 4). Among the transcripts showing the largest increase in abundance are those  
351 derived from genes within a putative *vanARB* (*rpa3619-3621*) operon. The *vanARB* genes are  
352 annotated as coding for a GntR-family transcriptional regulator (VanR) (41), homologues of which  
353 are known or proposed to act as repressors of the *vanAB* genes (42-45). The VanAB proteins are  
354 known or predicted subunits of an enzyme (VanAB) with aromatic ring-hydroxylating activity (16,  
355 42). Homologues of VanAB are known or predicted to contain an oxygen-sensitive iron sulfur  
356 cluster that catalyzes the oxidation of vanillic acid to protocatechuic acid and formaldehyde in  
357 *Bradyrhizobium diazoefficiens* (*japonicum*) (46) and *Pseudomonas* sp. strain HR199 (47). In  
358 addition, a VanAB homologue in a *Streptomyces* strain has the reported ability to demethylate  
359 syringic acid as well as other aromatic compounds (48).

360 The increased transcript abundance of the *vanARB* genes, which are associated with aerobic  
361 degradation of methoxylated aromatic compounds in other bacteria, was unexpected given that the



362 RNA was isolated from cells grown under anaerobic photoheterotrophic conditions. As described  
363 in the Materials and Methods section, for RNA-seq experiments cultures were continuously  
364 bubbled with N<sub>2</sub> and CO<sub>2</sub> to avoid air entering the cultures. For all other experiments, culture tubes  
365 were completely filled with medium leaving no headspace, and when samples were withdrawn  
366 from the cultures for chemical analyses, the resulting headspace was flushed with argon gas to  
367 prevent introducing air into the cultures. These are standard techniques that have been successfully  
368 employed to grow anaerobic bacterial cultures and isolate oxygen-sensitive proteins in their active  
369 form (24).

370 We also monitored the abundance of diagnostic transcripts as a reporter for the presence of oxygen  
371 in our photoheterotrophic cultures. Analysis of transcript abundance of photoheterotrophically  
372 grown cultures shows that there is relatively low abundance of those encoding HemF, an oxygen-  
373 dependent coproporphyrinogen oxidase (RPA1514), or subunits of the low affinity enzymes in the  
374 aerobic respiratory chain, such as cytochrome *bd* (RPA1319, RPA4452, and RPA4793-4794) or  
375 cytochrome *aa<sub>3</sub>* oxidases (RPA1453, RPA4183 and RPA0831-0836) (Table S3). In contrast,  
376 transcripts from genes encoding subunits of the high affinity cytochrome *cbb<sub>3</sub>* oxidase (RPA0015-  
377 0019), the oxygen-independent coproporphyrinogen oxidase HemN (RPA1666), those needed for  
378 anaerobic growth in the light (15, 49), including ones that encode pigment biosynthetic enzymes  
379 or pigment-binding proteins of the photosynthetic apparatus (RPA1505-1507, RPA1521-1548,  
380 RPA1667-1668, RPA3568), plus others whose induction requires the global anaerobic regulator  
381 FixK (RPA1006-1007, RPA1554) (50, 51) are on average ~32-fold more abundant in the  
382 photoheterotrophic cultures than those mentioned above which are associated with growth in the  
383 presence of oxygen ( $p = 0.01$ , unpaired t-test) (Table S3). This analysis provides independent

384 experimental evidence that the photoheterotrophic cultures used as a source of RNA or for other  
385 experiments in this study were anaerobic.

386 Nevertheless, to further test whether oxygen influences the ability of SA008.1.07 to degrade  
387 syringic acid, we performed two additional experiments. First, when we tested SA008.1.07 for  
388 aerobic growth on the methoxylated aromatics syringic acid and vanillic acid (Figure S5), we  
389 found that this adapted strain cannot grow on syringic acid aerobically. We also performed growth  
390 experiments in which additional steps were taken to eliminate oxygen from the media. For this,  
391 we used 100 mL serum bottles, added PM media containing syringic acid, and sealed them with  
392 rubber septa and aluminum crimp caps. We then flushed the PM media with argon gas for 20 min,  
393 then applied vacuum to remove gases from the bottles, and re-flushed them with argon. This  
394 process was repeated three times to remove as much oxygen as possible. As a control that  
395 simulated conditions used in the experiments described earlier, another group of 100 mL serum  
396 bottles was used, but in this case the bottles were sealed without using the degassing procedure.  
397 SA008.1.07 was inoculated into both sets of bottles through sterilized syringes and needles. In  
398 these experiments, we observed no significant difference on the growth of SA008.1.07, the  
399 consumption of syringic acid, or the production of DMBQ between the degassed bottles and the  
400 non-degassed controls (Figure S6), demonstrating that any traces of oxygen potentially present at  
401 the initiation of the incubations did not influence the ability of *R. palustris* SA008.1.07 to grow on  
402 syringic acid under anaerobic photoheterotrophic conditions.

403 Based on these results, we proceeded to investigate whether the *vanARB* operon participated in  
404 anaerobic syringic acid degradation by SA008.1.07. To do this, we deleted the entire *vanARB*  
405 operon in SA008.1.07 (SA $\Delta$ van, Table 1), and found that this strain lost its ability to grow  
406 anaerobically on syringic acid (Figure 7A). In addition, we found that transforming SA $\Delta$ van with

407 a plasmid carrying either the wild-type *vanARB* operon or only wild-type *vanAB*  
408 (SA $\Delta$ van.pBRvanARB or SA $\Delta$ van.pBRvanAB, Table 1) under control of a constitutive promoter  
409 rescues the ability of SA $\Delta$ van to grown on and degrade syringic acid under anaerobic conditions,  
410 although cell densities were lower than in SA008.1.07 (Figure 7A). Thus, we conclude that *vanAB*  
411 genes in the *R. palustris* *van* cluster are required for anaerobic degradation of syringic acid by  
412 SA008.1.07. In control experiments, we found that, as expected, the activity of the BAD and HBA  
413 aromatic pathways were not affected by the loss of *vanARB*, as SA $\Delta$ van is able to grow  
414 photoheterotrophically on 4-HBA or benzoic acid (Figure 7B). Placing the same *vanARB* plasmid  
415 in the wild-type CGA009 strain (A9pBRvanARB, Table 1) does not confer this strain with the  
416 ability to grow on syringic acid (Figure 7A), indicating that yet to be identified genes outside this  
417 operon are required for syringic acid metabolism by SA008.1.07.

418 In addition to the genes in the *vanARB* operon, we also tested the effect of deleting two other genes  
419 that showed increased transcript abundance during growth on syringic acid. One gene was an  
420 oxidoreductase that had one of the highest increases in transcript abundance (*rpa2160*) and the  
421 other gene was a dioxygenase with a lower increase in transcript abundance (*rpa4286*) (Table 4).  
422 Experiments with deletion mutants of SA008.1.07 lacking these genes, SA $\Delta$ 2160 and SA $\Delta$ 4286  
423 respectively (Table 1), showed that neither deletion affected photoheterotrophic growth on  
424 syringic acid (Figure S7), indicating that these genes are not required for the breakdown of syringic  
425 acid by SA008.1.07.

426 **Identification of mutations in strains adapted to grow on syringic acid.** In an attempt to  
427 identify additional mutations that could confer *R. palustris* SA008.1.07 with the ability to grow  
428 photoheterotrophically on syringic acid, we re-sequenced strain SA008.1.07 along with 16 other  
429 *R. palustris* isolates that had acquired the same metabolic ability by following the same enrichment

430 and isolation experiments (Table S4). When the genome sequences of this panel of isolates were  
431 compared to that of *R. palustris* CGA009 (Table S5), only 4 mutations were found in the majority  
432 of the strains (Table 5). One mutation was an indel upstream of *rpa0746*, a gene annotated as  
433 encoding a *c*-type cytochrome of unknown function. A second mutation was a frameshift in  
434 *rpa1972*, a gene annotated as encoding a two-component sensor histidine kinase, for which no  
435 function is known. The other two mutations were non-synonymous, causing amino acid changes  
436 in *rpa2457*, a hypothetical protein, and *rpa3268*, which encodes the  $\beta$ -subunit of RNA polymerase.  
437 No mutations were detected in the *vanARB* operon in any of the syringic acid-metabolizing strains  
438 that were sequenced.

439 We were unsuccessful in our attempts to delete *rpa2457* and *rpa3268* from SA008.1.07 using the  
440 methods used in this study, which is not surprising since both of these genes have been shown to  
441 be essential for the growth of *R. palustris* (15). We successfully deleted *rpa1972* in both CGA009  
442 and SA008.1.07, creating strains SA $\Delta$ 1972 and A9 $\Delta$ 1972, respectively. To test the hypothesis that  
443 the observed frameshift in *rpa1972* altered the function of this predicted histidine kinase and  
444 somehow influenced syringic acid degradation by SA008.1.07, we evaluated photoheterotrophic  
445 growth of both SA $\Delta$ 1972 and A9 $\Delta$ 1972 on syringic acid. This experiment showed that deletion of  
446 *rpa1972* in CGA009 did not enable A9 $\Delta$ 1972 to grow on syringic acid, nor did deletion of this  
447 gene in SA008.1.07 prevent SA $\Delta$ 1972 from growing on syringic acid (Figure S8). Therefore,  
448 additional efforts are needed to identify single or synergistic combinations of mutations in  
449 SA008.1.07 or other adapted strains that contribute to anaerobic growth on syringic acid.

450 **Concluding remarks.** Meta-methoxylated aromatics are present at significant levels in the lignin  
451 of different plants and are potential sources of compounds for industrial applications. In this work,  
452 we isolated a strain of *R. palustris* that acquired the ability to use syringic acid as a growth substrate

453 under photoheterotrophic conditions. Our strategy of incrementally exposing cultures to higher  
454 concentrations of syringic acid, while at the same time reducing the availability of the known  
455 growth substrates benzoic acid and 4-HBA, has been shown to be conducive to adaptation and  
456 acquisition of new metabolic activities in *R. palustris* (52, 53) and other bacteria (54). Our analysis  
457 of this adapted strain, SA008.1.07 has provided important new knowledge on the bacterial  
458 metabolism of syringic acid. First, we found that syringic acid degradation does not occur through  
459 or induce expression of the genes in the well-characterized BAD pathway. This finding makes  
460 syringic acid the first aromatic compound whose photoheterotrophic metabolism does not utilize  
461 the BAD pathway in *R. palustris*. In addition, the increased abundance of *vanARB* transcripts in  
462 SA008.1.07 cultures grown in the presence of syringic acid, and the requirement of *vanAB* for  
463 growth of this adapted strain on this methylated aromatic provide evidence for a heretofore  
464 unknown role of this enzyme in anaerobic metabolism of this compound. Since the previously  
465 reported function of *vanAB* is in the aerobic demethylation of vanillic acid (16, 42), our  
466 observations suggest that the VanAB enzyme may have an additional unrealized function under  
467 anaerobic conditions. Known homologues of VanAB are reported to contain an oxygen-sensitive  
468 iron sulfur cluster (47) so our findings reinforce that additional experiments are needed to test the  
469 role of this enzyme in anaerobic metabolism of syringic acid.

470 Our analysis of syringic acid metabolism by *R. palustris* SA008.1.07 sets the stage for further  
471 studies of metabolism of this and other aromatics by this and other bacteria, and for evaluating  
472 previously unexplored functions of the VanAB enzyme. Elucidating such novel pathways and  
473 metabolic functions could expand our ability to use microbial transformations of lignin and other  
474 renewable resources as bio-based sources of compounds with potential uses in the energy,  
475 chemical, pharmaceutical, and other industries.

476

## 477 **ACKNOWLEDGMENTS**

478 This work was supported by the Department of Energy Office of Science's Great Lakes Bioenergy  
479 Research Center, Grants DE-FC02-07ER64494 and DE-SC0018409, and the National Science  
480 Foundation, Grant CBET-1506820. J. Zachary Oshlag was supported by the National Institute of  
481 General Medical Sciences of the National Institutes of Health under Award Number  
482 T32GM008349. The genome sequencing work conducted by the U.S. Department of Energy Joint  
483 Genome Institute, a DOE Office of Science User Facility, is supported by the Office of Science of  
484 the U.S. Department of Energy under Contract No. DE-AC02-05CH11231. We thank Daniel L.  
485 Gall and Alan Higbee for preliminary work in the identification of DMBQ.

## 486 **CONFLICT OF INTEREST STATEMENT**

487 The authors declare no competing financial interest.

## 488 **REFERENCES**

- 489 1. Boerjan W, Ralph J, Baucher M. 2003. Lignin biosynthesis. Annual Review of Plant  
490 Biology 54:519-546. <https://doi.org/10.1146/annurev.arplant.54.031902.134938>.
- 491 2. Keating DH, Zhang Y, Ong IM, McIlwain S, Morales EH, Grass JA, Tremaine M,  
492 Bothfeld W, Higbee A, Ulbrich A, Balloon A, Westphall MS, Aldrich J, Lipton MS, Kim  
493 J, Moskvina O, Bukhman YV, Coon J, Kiley PJ, Bates DM, Landick R. 2014. Aromatic  
494 inhibitors derived from ammonia-pretreated lignocellulose hinder bacterial  
495 ethanologensis by activating regulatory circuits controlling inhibitor efflux and  
496 detoxification. Frontiers in Microbiology 5. <https://doi.org/10.3389/fmicb.2014.00402>.
- 497 3. Abdelaziz OY, Brink DP, Prothmann J, Ravi K, Sun M, García-Hidalgo J, Sandahl M,  
498 Hultberg CP, Turner C, Lidén G, Gorwa-Grauslund MF. 2016. Biological valorization

- 499 of low molecular weight lignin. *Biotechnology Advances* 34:1318-1346.  
500 <https://doi.org/10.1016/j.biotechadv.2016.10.001>.
- 501 4. Chundawat SPS, Vismeh R, Sharma LN, Humpula JF, Sousa LD, Chambliss CK, Jones  
502 AD, Balan V, Dale BE. 2010. Multifaceted characterization of cell wall decomposition  
503 products formed during ammonia fiber expansion (AFEX) and dilute acid based  
504 pretreatments. *Bioresource Technology* 101:8429-8438.  
505 <https://doi.org/10.1016/j.biortech.2010.06.027>.
- 506 5. Schwalbach MS, Keating DH, Tremaine M, Marner WD, Zhang YP, Bothfeld W, Higbee  
507 A, Grass JA, Cotten C, Reed JL, Sousa LD, Jin MJ, Balan V, Ellinger J, Dale B, Kiley  
508 PJ, Landick R. 2012. Complex Physiology and Compound Stress Responses during  
509 Fermentation of Alkali-Pretreated Corn Stover Hydrolysate by an *Escherichia coli*  
510 Ethanologen. *Applied and Environmental Microbiology* 78:3442-3457.  
511 <https://doi.org/10.1128/aem.07329-11>.
- 512 6. Pisithkul T, Jacobson TB, O'Brien TJ, Stevenson DM, Amador-Noguez D. 2015.  
513 Phenolic amides are potent inhibitors of *de novo* nucleotide biosynthesis. *Applied and*  
514 *Environmental Microbiology* 81:5761-5772. <https://doi.org/10.1128/AEM.01324-15>.
- 515 7. Palmqvist E, Hahn-Hägerdal B. 2000. Fermentation of lignocellulosic hydrolysates. II:  
516 inhibitors and mechanisms of inhibition. *Bioresource Technology* 74:25-33.  
517 [https://doi.org/10.1016/S0960-8524\(99\)00161-3](https://doi.org/10.1016/S0960-8524(99)00161-3).
- 518 8. Piotrowski JS, Zhang Y, Bates DM, Keating DH, Sato TK, Ong IM, Landick R. 2014.  
519 Death by a thousand cuts: the challenges and diverse landscape of lignocellulosic  
520 hydrolysate inhibitors. *Front Microbiol* 5:90. <https://doi.org/10.3389/fmicb.2014.00090>.
- 521 9. Lee HJ, Lim WS, Lee JW. 2013. Improvement of ethanol fermentation from  
522 lignocellulosic hydrolysates by the removal of inhibitors. *Journal of Industrial and*  
523 *Engineering Chemistry* 19:2010-2015. <https://doi.org/10.1016/j.jiec.2013.03.014>.
- 524 10. Prothmann J, Sun M, Spiegel P, Sandahl M, Turner C. 2017. Ultra-high-performance  
525 supercritical fluid chromatography with quadrupole-time-of-flight mass spectrometry

- 526 (UHPSFC/QTOF-MS) for analysis of lignin-derived monomeric compounds in processed  
527 lignin samples. *Anal Bioanal Chem* 409:7049-7061. [https://doi.org/10.1007/s00216-017-](https://doi.org/10.1007/s00216-017-0663-5)  
528 [0663-5](https://doi.org/10.1007/s00216-017-0663-5).
- 529 11. Rahimi A, Ulbrich A, Coon JJ, Stahl SS. 2014. Formic-acid-induced depolymerization of  
530 oxidized lignin to aromatics. *Nature* 515:249-252. <https://doi.org/10.1038/nature13867>.
- 531 12. Yan N, Zhao C, Dyson PJ, Wang C, Liu LT, Kou Y. 2008. Selective degradation of wood  
532 lignin over noble-metal catalysts in a two-step process. *ChemSusChem* 1:626-9.  
533 <https://doi.org/10.1002/cssc.200800080>.
- 534 13. Luterbacher JS, Azarpira A, Motagamwala AH, Lu F, Ralph J, Dumesic JA. 2015. Lignin  
535 monomer production integrated into the  $\gamma$ -valerolactone sugar platform. *Energy &*  
536 *Environmental Science* 8:2657-2663. <https://doi.org/10.1039/C5EE01322D>.
- 537 14. Harwood CS, Gibson J. 1988. Anaerobic and aerobic metabolism of diverse aromatic  
538 compounds by the photosynthetic bacterium *Rhodopseudomonas palustris*. *Applied and*  
539 *Environmental Microbiology* 54:712-717.
- 540 15. Pechter KB, Gallagher L, Pyles H, Manoil CS, Harwood CS. 2015. Essential genome of  
541 the metabolically versatile alphaproteobacterium *Rhodopseudomonas palustris*. *J*  
542 *Bacteriol* 198:867-76. <https://doi.org/10.1128/JB.00771-15>.
- 543 16. Larimer FW, Chain P, Hauser L, Lamerdin J, Malfatti S, Do L, Land ML, Pelletier DA,  
544 Beatty JT, Lang AS, Tabita FR, Gibson JL, Hanson TE, Bobst C, Torres J, Peres C,  
545 Harrison FH, Gibson J, Harwood CS. 2004. Complete genome sequence of the  
546 metabolically versatile photosynthetic bacterium *Rhodopseudomonas palustris*. *Nature*  
547 *Biotechnology* 22:55-61. <https://doi.org/10.1038/nbt923>.
- 548 17. Harwood CS, Burchhardt G, Herrmann H, Fuchs G. 1999. Anaerobic metabolism of  
549 aromatic compounds via the benzoyl-CoA pathway. *FEMS Microbiology Reviews*  
550 22:439-458. <https://doi.org/10.1111/j.1574-6976.1998.tb00380.x>.
- 551 18. Pan C, Oda Y, Lankford PK, Zhang B, Samatova NF, Pelletier DA, Harwood CS, Hettich  
552 RL. 2008. Characterization of anaerobic catabolism of p-coumarate in



- 553 *Rhodopseudomonas palustris* by integrating transcriptomics and quantitative proteomics.  
554 Molecular & Cellular Proteomics 7:938-948. [https://doi.org/10.1074/mcp.M700147-](https://doi.org/10.1074/mcp.M700147-MCP200)  
555 [MCP200](https://doi.org/10.1074/mcp.M700147-MCP200).
- 556 19. Eglund PG, Pelletier DA, Dispensa M, Gibson J, Harwood CS. 1997. A cluster of  
557 bacterial genes for anaerobic benzene ring biodegradation. Proceedings of the National  
558 Academy of Sciences of the United States of America 94:6484-6489.  
559 <https://doi.org/10.1073/pnas.94.12.6484>.
- 560 20. Hirakawa H, Schaefer AL, Greenberg EP, Harwood CS. 2012. Anaerobic p-Coumarate  
561 Degradation by *Rhodopseudomonas palustris* and Identification of CouR, a MarR  
562 Repressor Protein That Binds p-Coumaroyl Coenzyme A. Journal of Bacteriology  
563 194:1960-1967. <https://doi.org/10.1128/jb.06817-11>.
- 564 21. Austin S, Kontur W, Ulbrich A, Oshlag JZ, Higbee A, Zhang Y, Coon JJ, Hodge DB,  
565 Donohue TJ, Noguera DR. 2015. Metabolism of multiple aromatic compounds in corn  
566 stover hydrolysate by *Rhodopseudomonas palustris*. Environmental Science &  
567 Technology 49:8914–8922. <https://doi.org/10.1021/acs.est.5b02062>.
- 568 22. Kim MK, Harwood CS. 1991. Regulation of benzoate-CoA ligase in *Rhodopseudomonas*  
569 *palustris*. FEMS Microbiology Letters 83:199-203. [https://doi.org/10.1111/j.1574-](https://doi.org/10.1111/j.1574-6968.1991.tb04441.x)  
570 [6968.1991.tb04441.x](https://doi.org/10.1111/j.1574-6968.1991.tb04441.x).
- 571 23. Bertani G. 1951. Studies on lysogenesis I : The mode of phage liberation by lysogenic  
572 *Escherichia coli*. Journal of Bacteriology 62:293-300.
- 573 24. Sutton VR, Kiley PJ. 2003. Techniques for studying the oxygen-sensitive transcription  
574 factor FNR from *Escherichia coli*. Rna Polymerases and Associated Factors, Pt C  
575 370:300-312. [https://doi.org/10.1016/S0076-6879\(03\)70027-5](https://doi.org/10.1016/S0076-6879(03)70027-5).
- 576 25. Gall DL, Ralph J, Donohue TJ, Noguera DR. 2013. Benzoyl Coenzyme A pathway-  
577 mediated metabolism of *meta*-hydroxy-aromatic acids in *Rhodopseudomonas palustris*.  
578 Journal of Bacteriology 195:4112-4120. <https://doi.org/10.1128/jb.00634-13>.

- 579 26. Tavano CL, Podevels AM, Donohue TJ. 2005. Identification of genes required for  
580 recycling reducing power during photosynthetic growth. *Journal of Bacteriology*  
581 187:5249-5258. <https://doi.org/10.1128/JB.187.15.5249-5258.2005>.
- 582 27. Bolger AM, Lohse M, Usadel B. 2014. Trimmomatic: a flexible trimmer for Illumina  
583 sequence data. *Bioinformatics* 30:2114-20.  
584 <https://doi.org/10.1093/bioinformatics/btu170>.
- 585 28. Langmead B, Salzberg SL. 2012. Fast gapped-read alignment with Bowtie 2. *Nat*  
586 *Methods* 9:357-9. <https://doi.org/10.1038/nmeth.1923>.
- 587 29. Anders S, Pyl PT, Huber W. 2015. HTSeq--a Python framework to work with high-  
588 throughput sequencing data. *Bioinformatics* 31:166-9.  
589 <https://doi.org/10.1093/bioinformatics/btu638>.
- 590 30. Love MI, Huber W, Anders S. 2014. Moderated estimation of fold change and dispersion  
591 for RNA-seq data with DESeq2. *Genome Biol* 15:550. [https://doi.org/10.1186/s13059-](https://doi.org/10.1186/s13059-014-0550-8)  
592 [014-0550-8](https://doi.org/10.1186/s13059-014-0550-8).
- 593 31. Benjamini Y HY. 1995. Controlling the false discovery rate: a practical and powerful  
594 approach to multiple testing. *J R Statist Soc B* 57:289-300.
- 595 32. Chen WP, Kuo TT. 1993. A simple and rapid method for the preparation of gram-  
596 negative bacterial genomic DNA. *Nucleic Acids Res* 21:2260.  
597 <https://doi.org/10.1093/nar/21.9.2260>.
- 598 33. Li H, Durbin R. 2009. Fast and accurate short read alignment with Burrows-Wheeler  
599 transform. *Bioinformatics* 25:1754-60. <https://doi.org/10.1093/bioinformatics/btp324>.
- 600 34. Li H, Handsaker B, Wysoker A, Fennell T, Ruan J, Homer N, Marth G, Abecasis G,  
601 Durbin R, Genome Project Data Processing S. 2009. The Sequence Alignment/Map  
602 format and SAMtools. *Bioinformatics* 25:2078-9.  
603 <https://doi.org/10.1093/bioinformatics/btp352>.

- 604 35. Froehlich B, Parkhill J, Sanders M, Quail MA, Scott JR. 2005. The pCoo plasmid of  
605 enterotoxigenic *Escherichia coli* is a mosaic cointegrate. J Bacteriol 187:6509-16.  
606 <https://doi.org/10.1128/JB.187.18.6509-6516.2005>.
- 607 36. Schäfer A, Tauch A, Jäger W, Kalinowski J, Thierbach G, Pühler A. 1994. Small  
608 mobilizable multi-purpose cloning vectors derived from the *Escherichia coli* plasmids  
609 pK18 and pK19: selection of defined deletions in the chromosome of *Corynebacterium*  
610 *glutamicum*. Gene 145:69-73. [https://doi.org/10.1016/0378-1119\(94\)90324-7](https://doi.org/10.1016/0378-1119(94)90324-7).
- 611 37. Kovach ME, Elzer PH, Steven Hill D, Robertson GT, Farris MA, Roop Ii RM, Peterson  
612 KM. 1995. Four new derivatives of the broad-host-range cloning vector pBBR1MCS,  
613 carrying different antibiotic-resistance cassettes. Gene 166:175-176.  
614 [https://doi.org/10.1016/0378-1119\(95\)00584-1](https://doi.org/10.1016/0378-1119(95)00584-1).
- 615 38. Merkel SM, Eberhard AE, Gibson J, Harwood CS. 1989. Involvement of coenzyme A  
616 thioesters in anaerobic metabolism of 4-hydroxybenzoate by *Rhodopseudomonas*  
617 *palustris*. Journal of Bacteriology 171:1-7. <https://doi.org/10.1128/jb.171.1.1-7.1989>.
- 618 39. Yadid I, Rudolph J, Hlouchova K, Copley SD. 2013. Sequestration of a highly reactive  
619 intermediate in an evolving pathway for degradation of pentachlorophenol. Proceedings  
620 of the National Academy of Sciences of the United States of America 110:E2182-E2190.  
621 <https://doi.org/10.1073/pnas.1214052110>.
- 622 40. Gibson J, Dispensa M, Harwood CS. 1997. 4-hydroxybenzoyl coenzyme A reductase  
623 (dehydroxylating) is required for anaerobic degradation of 4-hydroxybenzoate by  
624 *Rhodopseudomonas palustris* and shares features with molybdenum-containing  
625 hydroxylases. Journal of Bacteriology 179:634-642. [https://doi.org/10.1128/jb.179.3.634-  
626 642.1997](https://doi.org/10.1128/jb.179.3.634-642.1997).
- 627 41. Altschul SF, Gish W, Miller W, Myers EW, Lipman DJ. 1990. Basic Local Alignment  
628 Search Tool. Journal Of Molecular Biology 215:403-410. [https://doi.org/10.1016/S0022-  
629 2836\(05\)80360-2](https://doi.org/10.1016/S0022-2836(05)80360-2).

- 630 42. Sugawara M, Tsukui T, Kaneko T, Ohtsubo Y, Sato S, Nagata Y, Tsuda M, Mitsui H,  
631 Minamisawa K. 2017. Complete Genome Sequence of *Bradyrhizobium diazoefficiens*  
632 USDA 122, a Nitrogen-Fixing Soybean Symbiont. *Genome Announcements* 5:e01743-  
633 16. <https://doi.org/10.1128/genomeA.01743-16>.
- 634 43. Morawski B, Segura A, Ornston LN. 2000. Repression of *Acinetobacter* vanillate  
635 demethylase synthesis by VanR, a member of the GntR family of transcriptional  
636 regulators. *FEMS Microbiology Letters* 187:65-68. [https://doi.org/10.1111/j.1574-  
637 6968.2000.tb09138.x](https://doi.org/10.1111/j.1574-6968.2000.tb09138.x).
- 638 44. Thanbichler M, Iniesta AA, Shapiro L. 2007. A comprehensive set of plasmids for  
639 vanillate- and xylose-inducible gene expression in *Caulobacter crescentus*. *Nucleic Acids*  
640 *Research* 35:16. <https://doi.org/10.1093/nar/gkm818>.
- 641 45. Heravi KM, Lange J, Watzlawick H, Kalinowski J, Altenbuchner J. 2015. Transcriptional  
642 Regulation of the Vanillate Utilization Genes (vanABK Operon) of *Corynebacterium*  
643 *glutamicum* by VanR, a PadR-Like Repressor. *Journal of Bacteriology* 197:959-972.  
644 <https://doi.org/10.1128/jb.02431-14>.
- 645 46. Sudtachat N, Ito N, Itakura M, Masuda S, Eda S, Mitsui H, Kawaharada Y, Minamisawa  
646 K. 2009. Aerobic vanillate degradation and C1 compound metabolism in *Bradyrhizobium*  
647 *japonicum*. *Applied and environmental microbiology* 75:5012-5017.  
648 <https://doi.org/10.1128/AEM.00755-09>.
- 649 47. Priefert H, Rabenhorst J, Steinbuchel A. 1997. Molecular characterization of genes of  
650 *Pseudomonas* sp. strain HR199 involved in bioconversion of vanillin to protocatechuate.  
651 *J Bacteriol* 179:2595-607. <https://doi.org/10.1128/jb.179.8.2595-2607.1997>.
- 652 48. Nishimura M, Nishimura Y, Abe C, Kohhata M. 2014. Expression and Substrate Range  
653 of *Streptomyces* Vanillate Demethylase. *Biological & Pharmaceutical Bulletin* 37:1564-  
654 1568. <https://doi.org/10.1248/bpb.b14-00337>.

- 655 49. Yang JM, Yin L, Lessner FH, Nakayasu ES, Payne SH, Fixen KR, Gallagher L, Harwood  
656 CS. 2017. Genes essential for phototrophic growth by a purple alphaproteobacterium.  
657 *Environmental Microbiology* 19:3567-3578. <https://doi.org/10.1111/1462-2920.13852>.
- 658 50. Dailey HA, Dailey TA, Gerdes S, Jahn D, Jahn M, O'Brian MR, Warren MJ. 2017.  
659 Prokaryotic Heme Biosynthesis: Multiple Pathways to a Common Essential Product.  
660 *Microbiology and Molecular Biology Reviews* 81:62.  
661 <https://doi.org/10.1128/membr.00048-16>.
- 662 51. Rey FE, Harwood CS. 2010. FixK, a global regulator of microaerobic growth, controls  
663 photosynthesis in *Rhodopseudomonas palustris*. *Mol Microbiol* 75:1007-20.  
664 <https://doi.org/10.1111/j.1365-2958.2009.07037.x>.
- 665 52. Oda Y, de Vries YP, Forney LJ, Gottschal JC. 2001. Acquisition of the ability for  
666 *Rhodopseudomonas palustris* to degrade chlorinated benzoic acids as the sole carbon  
667 source. *FEMS Microbiology Ecology* 38:133-139. [https://doi.org/10.1111/j.1574-  
668 6941.2001.tb00891.x](https://doi.org/10.1111/j.1574-6941.2001.tb00891.x).
- 669 53. Samanta SK, Harwood CS. 2005. Use of the *Rhodopseudomonas palustris* genome  
670 sequence to identify a single amino acid that contributes to the activity of a coenzyme A  
671 ligase with chlorinated substrates. *Molecular Microbiology* 55:1151-1159.  
672 <https://doi.org/10.1111/j.1365-2958.2004.04452.x>.
- 673 54. Blount ZD, Borland CZ, Lenski RE. 2008. Historical contingency and the evolution of a  
674 key innovation in an experimental population of *Escherichia coli*. *Proc Natl Acad Sci U*  
675 *S A* 105:7899-906. <https://doi.org/10.1073/pnas.0803151105>.
- 676 55. Simon R, Priefer U, Pühler A. 1983. A Broad Host Range Mobilization System for In  
677 Vivo Genetic Engineering: Transposon Mutagenesis in Gram Negative Bacteria.  
678 *Bio/Technology* 1:784. <https://doi.org/10.1038/nbt1183-784>.
- 679
- 680

681 **Table 1.** List of strains and plasmids used in this study

| Strain/Plasmid                     | Description                                                                                                                                                                       | Source         |
|------------------------------------|-----------------------------------------------------------------------------------------------------------------------------------------------------------------------------------|----------------|
| <b><i>E. coli</i> strains</b>      |                                                                                                                                                                                   |                |
| DH5 $\alpha$                       | <i>supE44 lacU169</i> ( $\phi$ 80 $\Delta$ <i>lacZ</i> M15) <i>hsdR178 recA1 endA1 gyrA96 thi-1 relA1</i>                                                                         | Invitrogen-THF |
| S17-1                              | C600::RP-4 2-(Tc::Mu) (Kn::Tn7) <i>thi pro hsdR</i> HsdM <sup>+</sup> <i>recA</i>                                                                                                 | (55)           |
| NEB® 5 $\alpha$                    | <i>fhuA2</i> $\Delta$ ( <i>argF-lacZ</i> )U169 <i>phoA glnV44</i> $\Phi$ 80 $\Delta$ ( <i>lacZ</i> )M15 <i>gyrA96 recA1 relA1 endA1 thi-1 hsdR17</i>                              | NEB            |
| <b><i>R. palustris</i> strains</b> |                                                                                                                                                                                   |                |
| CGA009                             | Wild-type strain                                                                                                                                                                  | (22)           |
| SA008.1.07                         | Derivative of CGA009 able to grow on syringic acid                                                                                                                                | This work      |
| SA $\Delta$ badE                   | Deletion of 3' end of <i>badD</i> , whole <i>badE</i> gene, and 5' end of <i>badF</i> in SA008.1.07. $\Omega$ Kn <sup>R</sup> cassette insertion in place of deleted nucleotides. | This work      |
| SA $\Delta$ hbaB                   | Deletion of <i>hbaB</i> in SA008.1.07                                                                                                                                             | This work      |
| SA $\Delta$ van                    | Deletion of <i>vanARB</i> operon in SA008.1.07                                                                                                                                    | This work      |
| A9pBRvanARB                        | Gm <sup>R</sup> ; CGA009 carrying pBRvanARB vector                                                                                                                                | This work      |
| SA $\Delta$ van.pBRvanARB          | Gm <sup>R</sup> ; SA $\Delta$ van carrying pBRvanARB vector                                                                                                                       | This work      |
| SA $\Delta$ van.pBRvanAB           | Gm <sup>R</sup> ; SA $\Delta$ van carrying pBRvanAB vector                                                                                                                        | This work      |
| SA $\Delta$ 2160                   | Deletion of <i>rpa2160</i> in SA008.1.07                                                                                                                                          | This work      |
| SA $\Delta$ 4286                   | Deletion of <i>rpa4286</i> in SA008.1.07                                                                                                                                          | This work      |
| SA $\Delta$ 1972                   | Deletion of <i>rpa1972</i> in SA008.1.07                                                                                                                                          | This work      |
| A9 $\Delta$ 1972                   | Deletion of <i>rpa1972</i> in CGA009                                                                                                                                              | This work      |
| <b>Plasmids</b>                    |                                                                                                                                                                                   |                |
| pSUP202                            | Mobilizable suicide plasmid                                                                                                                                                       | (55)           |
| pK18mobsacB                        | <i>oriV oriT mob sacB</i> Kn <sup>R</sup>                                                                                                                                         | (36)           |
| pS202badE                          | 3.7-kb fragment containing <i>badE</i> and most of surrounding genes <i>badD</i> and <i>badF</i> cloned into HindIII/BamHI sites of pSUP202                                       | This work      |
| pS202 $\Delta$ badE                | Deletion of 2.1-kb fragment containing <i>badE</i> , 3' end of <i>badD</i> , and 5' end of <i>badF</i> and insertion of 2.3-kb $\Omega$ Kn <sup>R</sup> cassette in pS202badE     | This work      |
| pK18hbaB                           | Kn <sup>R</sup> ; 2.1-kb fragment containing <i>hbaB</i> and 800-bp flanking regions cloned into XbaI/HindIII sites of pK18mobsacB                                                | This work      |
| pK18 $\Delta$ hbaB                 | Kn <sup>R</sup> ; Deletion of <i>hbaB</i> in pK18hbaB                                                                                                                             | This work      |
| pK $\Delta$ vanARB                 | Kn <sup>R</sup> ; ~1.5-kb upstream and ~1.5 downstream flanking regions of <i>vanARB</i> operon cloned into the XbaI/HindIII sites of pK18mobsacB                                 | This work      |
| pBBR1MCS-5                         | <i>IncA/C</i> , Gm <sup>R</sup> ; broad-host-range cloning vector                                                                                                                 | (37)           |
| pBRvanARB                          | Gm <sup>R</sup> ; <i>vanARB</i> operon cloned into pBBR1MCS-5 vector                                                                                                              | This work      |
| pBRvanAB                           | Gm <sup>R</sup> ; <i>vanA</i> and <i>vanB</i> genes cloned into pBBR1MCS-5 vector                                                                                                 | This work      |

682 **Table 2.** Endpoint analysis of *R. palustris* SA008.1.07 *bad* and *hba* mutants grown in PM media  
683 containing benzoic acid (1.41mM) and 4-HBA (1.63mM).

| <b>Culture</b>   | <b>Benzoic Acid<br/>(mM)</b> | <b>4-HBA<br/>(mM)</b> | <b>Final Cell Density<br/>(Klett Units)</b> |
|------------------|------------------------------|-----------------------|---------------------------------------------|
| SA008.1.07       | ND                           | ND                    | 172                                         |
| SA $\Delta$ badE | 1.36                         | 1.45                  | 18                                          |
| SA $\Delta$ hbaB | ND                           | 1.43                  | 81                                          |

ND = not detected

684

685

686 **Table 3.** Fold change of genes predicted to be associated with the BAD and peripheral pathways  
 687 when comparing growth on 4-HBA or syringic acid (SA) to succinate.

| Gene           | Name        | Predicted Product                                        | Log <sub>2</sub> (Fold Change) |                 |
|----------------|-------------|----------------------------------------------------------|--------------------------------|-----------------|
|                |             |                                                          | 4-HBA to Succinate             | SA to Succinate |
| <i>rpa0669</i> | <i>hbaA</i> | 4-hydroxybenzoate-CoA ligase                             | 9.98*                          | 3.63            |
| <i>rpa0670</i> | <i>hbaB</i> | 4-hydroxybenzoyl-CoA reductase subunit                   | 8.40*                          | 3.01            |
| <i>rpa0671</i> | <i>hbaC</i> | 4-hydroxybenzoyl-CoA reductase subunit                   | 8.37*                          | 2.58            |
| <i>rpa0653</i> | <i>badI</i> | 2-ketocyclohexanecarboxyl-CoA hydrolase                  | 7.84*                          | 2.94*           |
| <i>rpa0658</i> | <i>badE</i> | benzoyl-CoA reductase subunit                            | 7.68*                          | 0.36*           |
| <i>rpa0659</i> | <i>badF</i> | benzoyl-CoA reductase subunit                            | 7.39*                          | 1.13            |
| <i>rpa0660</i> | <i>badG</i> | benzoyl-CoA reductase subunit                            | 7.10*                          | 0.95            |
| <i>rpa0656</i> | <i>badC</i> | alcohol dehydrogenase                                    | 6.82*                          | 0.83            |
| <i>rpa0654</i> | <i>badH</i> | 2-hydroxycyclohexanecarboxyl-CoA dehydrogenase           | 6.70*                          | 2.00            |
| <i>rpa0651</i> | <i>aliA</i> | cyclohexanecarboxylate-CoA ligase                        | 6.38*                          | 1.00            |
| <i>rpa0672</i> | <i>hbaD</i> | 4-hydroxybenzoyl-CoA reductase subunit                   | 6.35*                          | 0.83            |
| <i>rpa0657</i> | <i>badD</i> | benzoyl-CoA reductase subunit                            | 6.09*                          | -0.40           |
| <i>rpa0655</i> | <i>badR</i> | benzoate anaerobic degradation transcription regulator   | 5.82*                          | 1.37            |
| <i>rpa0652</i> | <i>aliB</i> | cyclohexanecarboxyl-CoA dehydrogenase                    | 5.70*                          | 0.87            |
| <i>rpa0650</i> | <i>badK</i> | cyclohex-1-ene-1-carboxyl-CoA hydratase                  | 5.62*                          | 0.69            |
| <i>rpa0667</i> | <i>hbaF</i> | inner-membrane translocator                              | 5.50*                          | 0.98            |
| <i>rpa0662</i> | <i>badB</i> | ferredoxin                                               | 5.01*                          | 0.55            |
| <i>rpa0661</i> | <i>badA</i> | benzoate-CoA ligase                                      | 4.91*                          | 0.77            |
| <i>rpa0668</i> | <i>hbaE</i> | ABC transporter subunit substrate-binding component      | 4.83*                          | 0.95            |
| <i>rpa0665</i> | <i>hbaH</i> | ABC transporter ATP-binding protein                      | 4.67*                          | 0.50            |
| <i>rpa0673</i> | <i>hbaR</i> | hydroxybenzoate anaerobic degradation regulatory protein | 4.19*                          | 0.46*           |
| <i>rpa0666</i> | <i>hbaG</i> | ABC transporter ATP-binding protein                      | 4.10*                          | -0.01           |
| <i>rpa0664</i> | <i>badL</i> | acetyltransferase                                        | 3.64*                          | 0.04            |
| <i>rpa3714</i> | <i>pimC</i> | pimeloyl-CoA dehydrogenase large subunit                 | 3.60*                          | 0.67            |
| <i>rpa3713</i> | <i>pimD</i> | pimeloyl-CoA dehydrogenase small subunit                 | 3.43*                          | 0.23            |
| <i>rpa0663</i> | <i>badM</i> | transcriptional regulator BadM                           | 3.02*                          | -0.03           |
| <i>rpa3717</i> | <i>pimF</i> | enoyl-CoA hydratase                                      | 2.63*                          | 0.45            |
| <i>rpa3715</i> | <i>pimB</i> | acetyl-CoA acetyltransferase                             | 2.58*                          | -0.22           |
| <i>rpa3716</i> | <i>pimA</i> | AMP-dependent synthetase/ligase                          | 2.53*                          | 0.53            |

688 “\*” indicates statistically significant ( $p < 0.05$ ).

689



690 **Table 4.** Transcripts with highest increase in abundance when strain SA008.1.07 is grown on  
 691 syringic acid compared to growth on succinate.

| Gene           | Name        | Predicted Product                                     | Log <sub>2</sub> (Fold Change) |                    |
|----------------|-------------|-------------------------------------------------------|--------------------------------|--------------------|
|                |             |                                                       | SA to Succinate                | 4-HBA to Succinate |
| <i>rpa0910</i> | -           | pirin family protein                                  | 9.70                           | 1.95               |
| <i>rpa2160</i> | -           | 3-oxoacyl-ACP reductase                               | 7.88*                          | -1.36              |
| <i>rpa0909</i> | <i>wrbA</i> | NAD(P)H dehydrogenase (quinone)                       | 6.80*                          | 0.28               |
| <i>rpa3619</i> | <i>vanA</i> | aromatic ring-hydroxylating dioxygenase subunit alpha | 6.66*                          | 0.73               |
| <i>rpa2717</i> | -           | hypothetical protein                                  | 6.27*                          | 4.22               |
| <i>rpa3621</i> | <i>vanB</i> | oxidoreductase                                        | 6.11*                          | -0.29              |
| <i>rpa0005</i> | <i>hppD</i> | 4-hydroxyphenylpyruvate dioxygenase                   | 6.07                           | 1.72*              |
| <i>rpa3620</i> | <i>vanR</i> | GntR family transcriptional regulator                 | 6.01*                          | -1.34              |
| <i>rpa4284</i> | -           | polyisoprenoid-binding protein                        | 5.95*                          | -0.71              |
| <i>rpa4222</i> | -           | hypothetical protein                                  | 5.91*                          | 1.32*              |
| <i>rpa0319</i> | -           | hypothetical protein                                  | 5.90                           | 7.58*              |
| <i>rpa3329</i> | -           | hypothetical protein                                  | 5.87                           | 3.42               |
| <i>rpa1475</i> | -           | hypothetical protein                                  | 5.56                           | 0.59               |
| <i>rpa3631</i> | -           | 3-oxoacyl-ACP reductase                               | 5.52*                          | -1.20              |
| <i>rpa4285</i> | -           | malonic semialdehyde reductase                        | 5.51*                          | -1.73              |
| <i>rpa3565</i> | -           | L,D-transpeptidase                                    | 5.39                           | -2.17*             |
| <i>rpa3943</i> | -           | ferritin-like domain-containing protein               | 5.09*                          | 0.55*              |
| <i>rpa4394</i> | -           | isocitrate lyase                                      | 5.05*                          | 6.21*              |
| <i>rpa3308</i> | -           | ferritin-like domain-containing protein               | 5.03                           | 1.12               |
| <i>rpa0320</i> | -           | 4-coumaroyl-homoserine lactone synthase               | 5.00                           | 6.71*              |
| <i>rpa1089</i> | -           | hypothetical protein                                  | 4.99                           | 1.32               |
| <i>rpa0214</i> | -           | hypothetical protein                                  | 4.92*                          | 0.66*              |
| <i>rpa4220</i> | -           | L,D-transpeptidase                                    | 4.92                           | 0.68               |
| <i>rpa4286</i> | -           | dioxygenase                                           | 4.90*                          | -2.03              |
| <i>rpa2895</i> | -           | Hsp20/alpha crystallin family protein                 | 4.87                           | 0.92*              |

692 Shaded lines indicate that the gene was explored in this study.

693 “\*” indicates statistically significant ( $p < 0.05$ ).

694

695

696 **Table 5.** Mutations identified in more than half of the 17 adapted *R. palustris* strains conferring the ability of syringic acid degradation  
 697 compared with the genome of CGA009.

| Position | Reference | Alteration | Mutation Type  | Amino Acid Change          | Gene                       | Name        | Function                                    | Occurrence of Mutation |
|----------|-----------|------------|----------------|----------------------------|----------------------------|-------------|---------------------------------------------|------------------------|
| 826195   | C         | A          | INDEL          | -                          | Upstream<br><i>rpa0746</i> | -           | -                                           | 17 of 17 strains       |
| 2221051  | TC        | T          | Frame Shift    | -                          | <i>rpa1972</i>             | -           | two-component<br>sensor histidine<br>kinase | 17 of 17 strains       |
| 2795227  | G         | A          | Non-Synonymous | Glycine →<br>Aspartic Acid | <i>rpa2457</i>             | -           | hypothetical protein                        | 16 of 17 strains       |
| 3685350  | T         | G          | Non-Synonymous | Threonine →<br>Proline     | <i>rpa3268</i>             | <i>rpoB</i> | RNAP Beta                                   | 11 of 17 strains       |

698

699

700

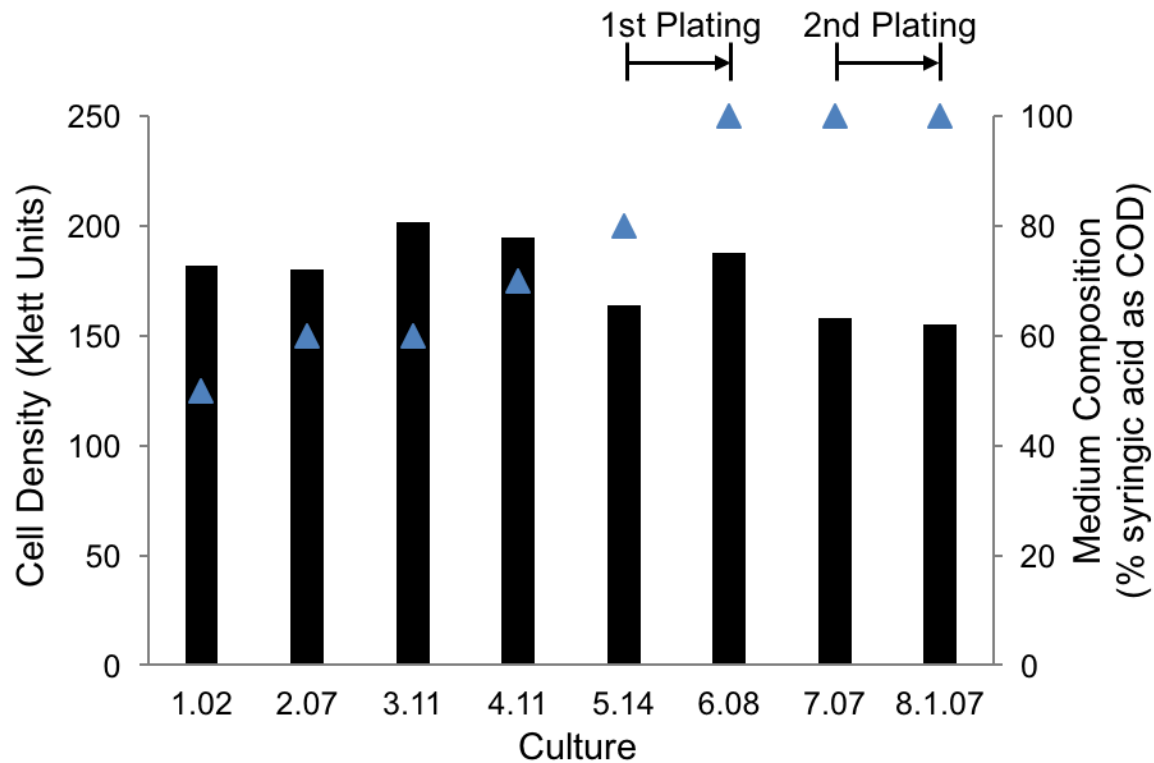

701

702

703

704

705

706

707

708

709

710

711

712

**Figure 1.** Final cell density (bars, Klett units) and percentage of syringic acid in the culture medium (blue triangles) during sequential anaerobic incubations. Culture 1.02 was started from a colony of *R. palustris* CGA009 that did not exhibit significant metabolism or growth on syringic acid as a sole carbon source. Each culture was seeded from a subculture of the prior one, except in the two instances indicated as 1<sup>st</sup> plating and 2<sup>nd</sup> plating in the figure. Cells were plated and single colonies selected for isolation prior to inoculation of cultures 6.08 and 8.1.07. The initial COD of the medium, used as a measurement of bioavailable organic carbon, was maintained at 1g COD/L in all cultures by decreasing the proportion of benzoic acid and 4-HBA upon increases in syringic acid. All cultures were grown anaerobically at 30 °C in sealed glass tubes under constant illumination.

713

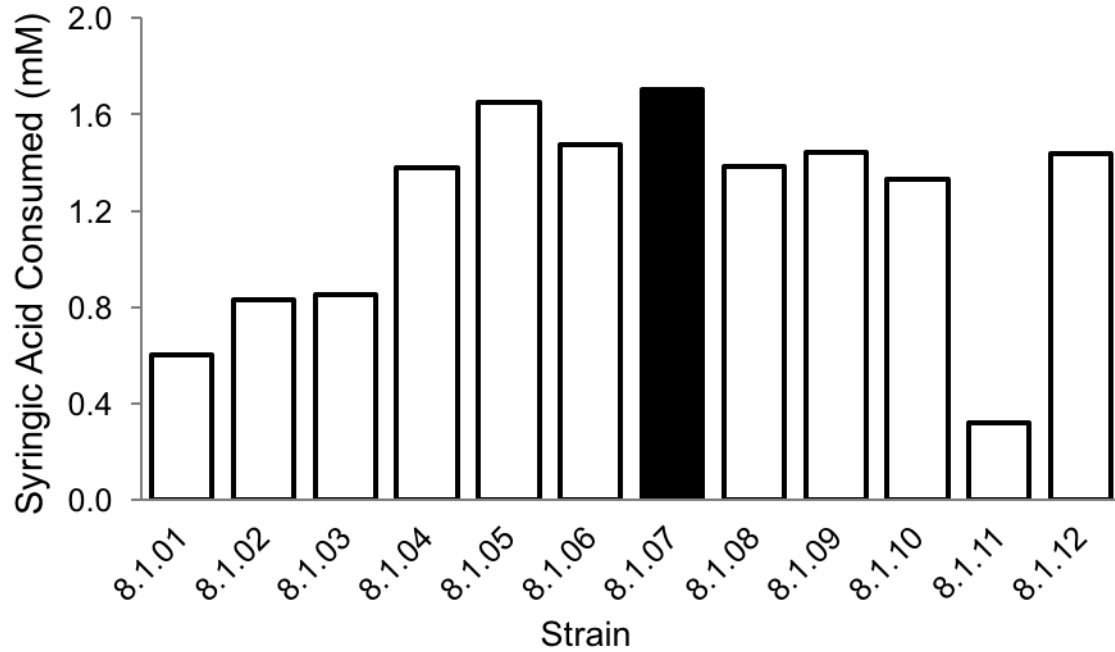

714

715 **Figure 2.** Syringic acid consumption by twelve strains isolated from culture 7.07 (Figure 1). Strain

716 SA008.1.07 had the highest syringic acid transformation and was selected for further study. The

717 initial concentration of syringic acid in these cultures was 3.47 mM.

718

719

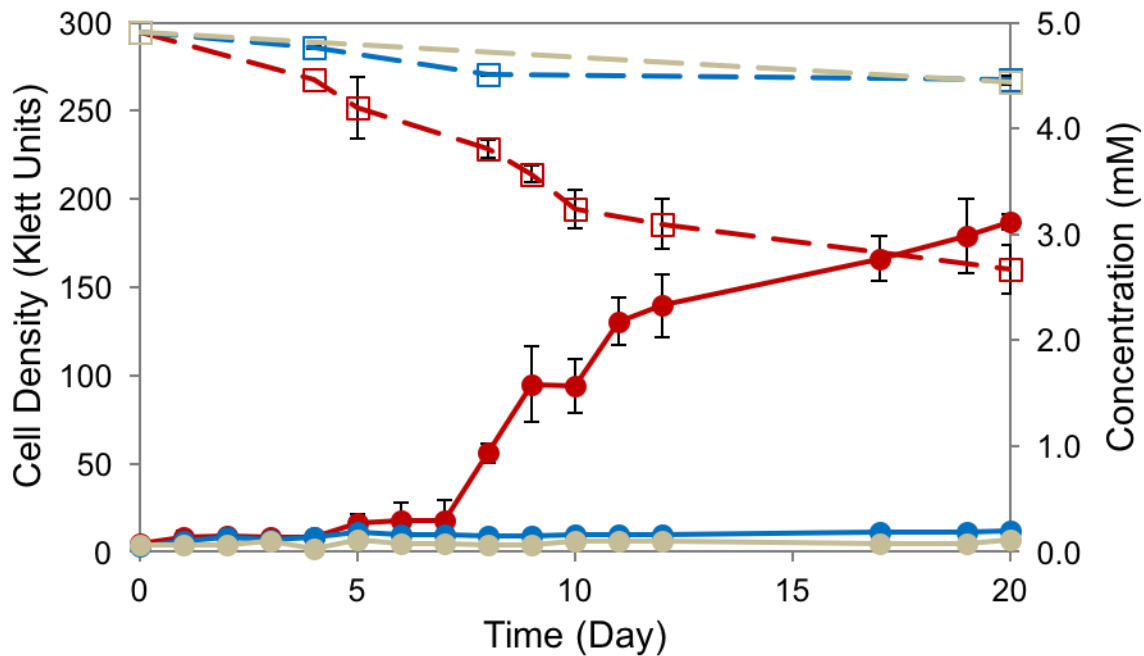

720

721 **Figure 3.** Anaerobic growth of *R. palustris* SA008.1.07 (red) on 5 mM syringic acid, compared to  
722 parent strain CGA009 (blue), and light-exposed abiotic control (grey). Solid lines are showing  
723 growth in Klett units (●), dashes are tracking concentrations of syringic acid (□). SA008.1.07  
724 consumed approximately half of the syringic acid initially present in the medium, while CGA009  
725 does not grow on syringic acid. Error bars represent standard deviations of experiments performed  
726 in triplicate.

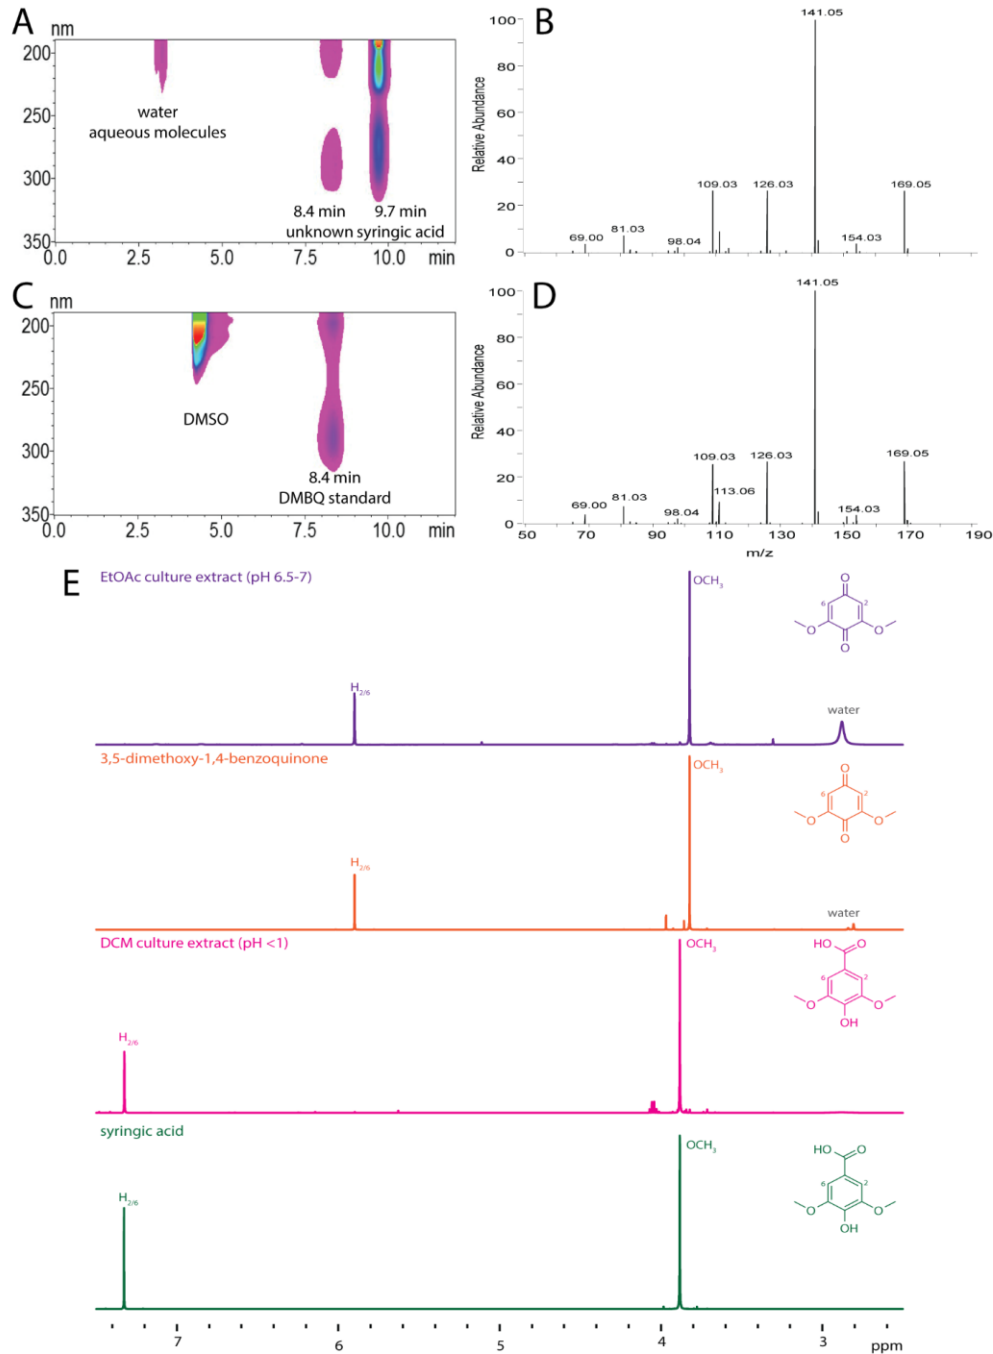

727  
728

729 **Figure 4.** Identification of DMBQ as a soluble extracellular product of SA008.1.07-grown syringic  
730 acid cultures. (A) HPLC contour view of PM-syringic acid medium after SA008.1.07 growth,  
731 showing peaks at 8.4 and 9.7 minutes, the latter corresponding with syringic acid. (B) LCMS/MS  
732 trace of compound isolated from collected peak at 8.4 minutes suggests an m/z ratio of 169.04  
733 g/mol (molecular weight ~ 168 g/mol). (C) HPLC contour view of DMBQ standard, showing  
734 retention time match to the unknown peak in panel A. Peak at 4 minutes is DMSO. (D) LCMS/MS  
735 trace of commercially purchased DMBQ showing match to the MS spectrum of unknown peak in  
736 panel B. (E) NMR trace of EtOAc extracted culture medium, authentic DMBQ standard, DCM  
737 extracted culture medium, and authentic syringic acid standard.

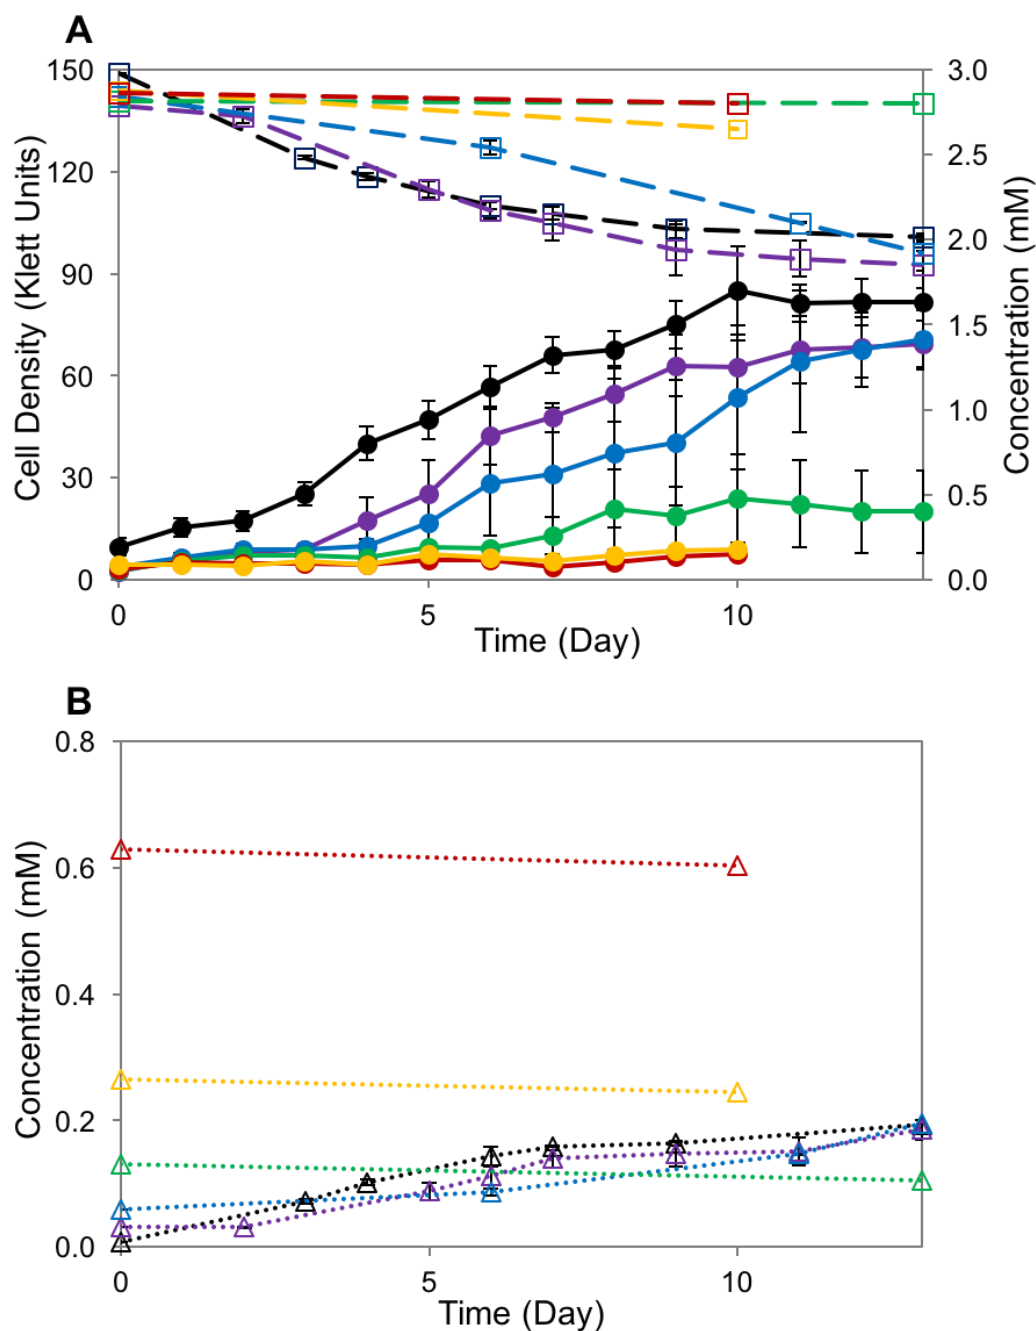

738  
739

740 **Figure 5.** Effect of DMBQ on syringic acid degradation by SA008.1.07. Cultures received 3 mM  
741 syringic acid and various starting concentrations of DMBQ (black 0 mM, violet 0.03 mM, blue  
742 0.06 mM, green 0.15 mM, yellow 0.3 mM, red 0.6 mM). (A) Solid lines show cell density in Klett  
743 units (●); dashed lines show syringic acid concentration (□). (B) DMBQ concentrations. As the  
744 initial concentration of DMBQ increased, cell growth and syringic acid degradation decreased.  
745 Cultures with DMBQ concentrations 0.15 mM or greater showed no growth.

746

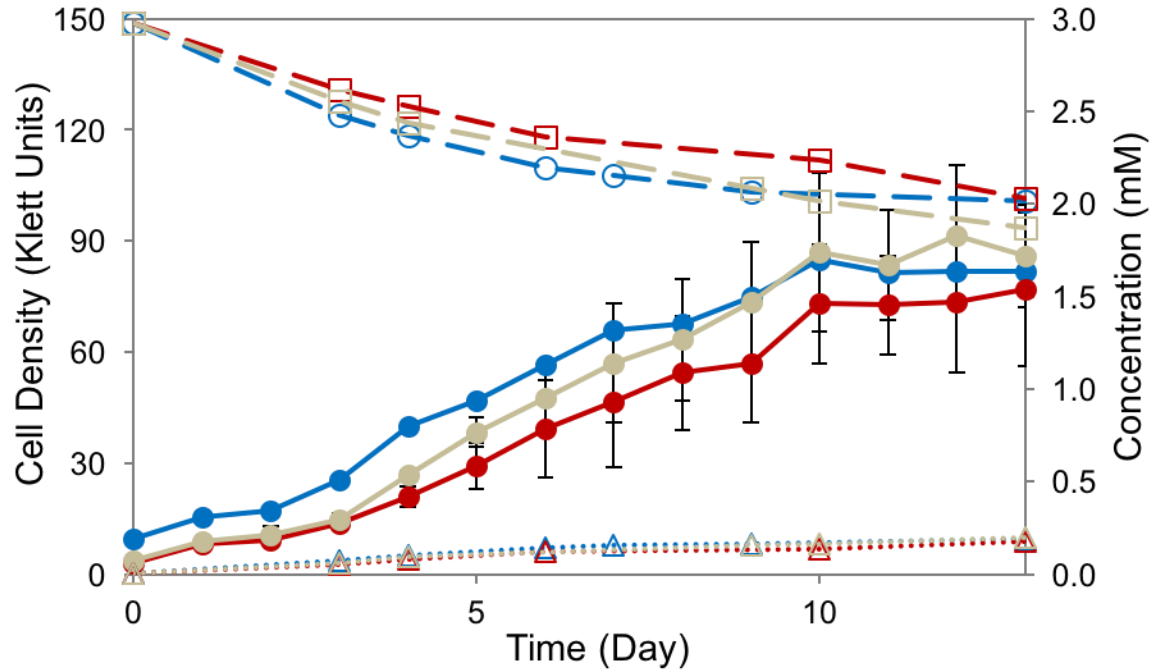

747

748 **Figure 6.** Photoheterotrophic degradation of syringic acid by *R. palustris* strains SA008.1.07  
749 (blue), SAΔbadE (red), and SAΔhbaB (grey). Solid lines are showing cell density in Klett units  
750 (●), dashed lines show concentrations of syringic acid (□), and dotted lines show DMBQ  
751 concentrations (Δ).

752

753



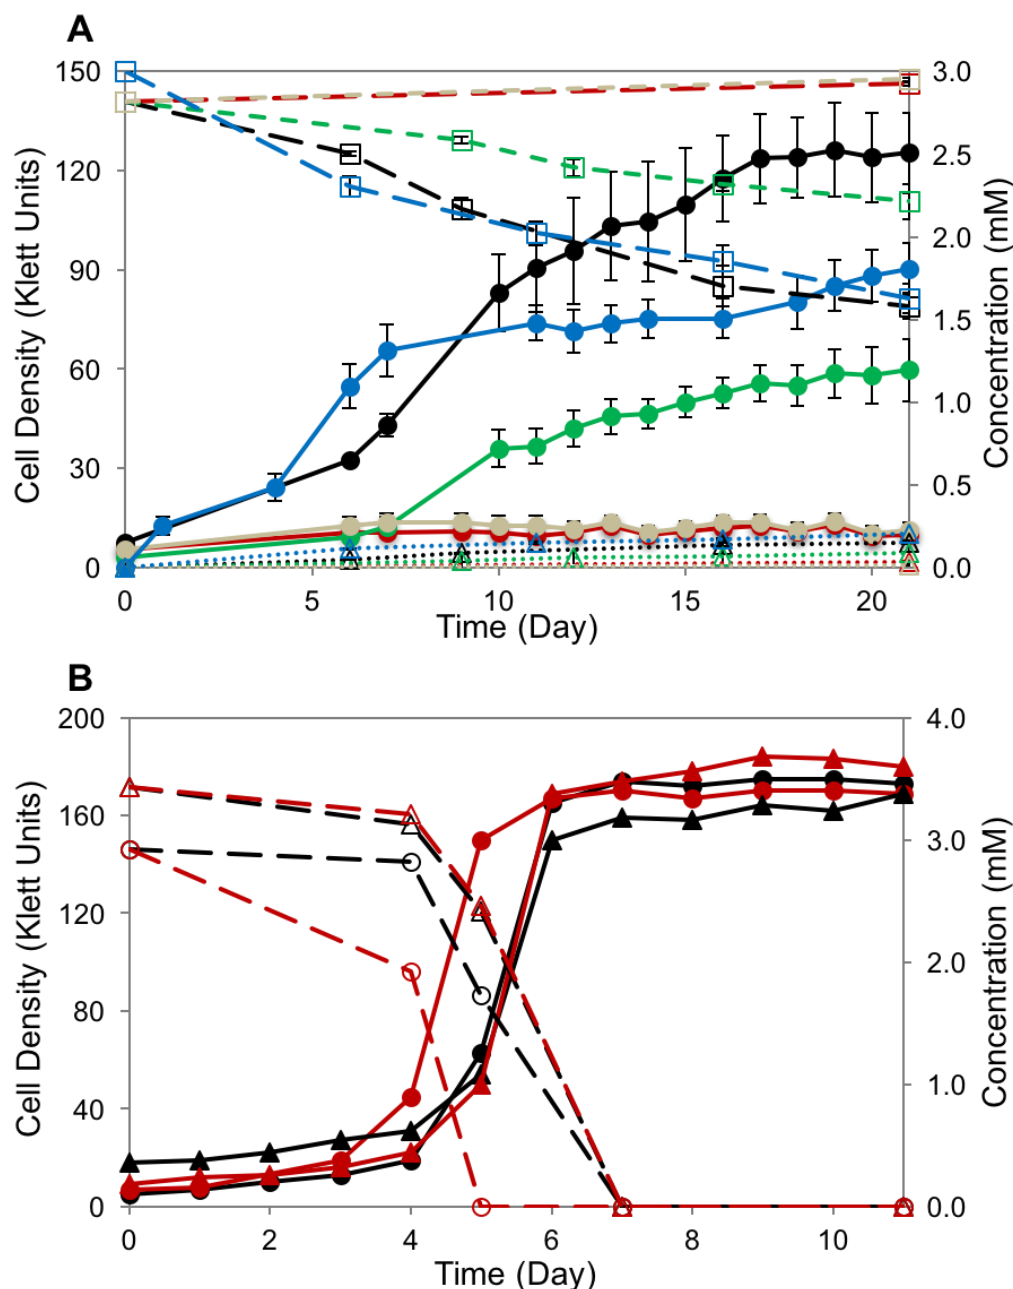

754  
 755 **Figure 7.** (A) *R. palustris* SA $\Delta$ van (red), a mutant culture of SA008.1.07 (black) with the *vanARB*  
 756 operon deleted, does not grow on syringic acid. The complementation of *vanARB* on expression  
 757 plasmid pBRVanARB and pBRVanAB restores syringic acid degrading activity in  
 758 SA $\Delta$ van.pBRvanARB (green) and SA $\Delta$ van.pBRvanAB (blue). The expression plasmid  
 759 pBRVanARB does not impart syringic acid degrading activity when inserted into wild-type strain  
 760 CGA009 (A9pBRvanARB, grey). Solid lines are showing growth in Klett units (●), dashes  
 761 tracking concentrations of syringic acid (□), and dotted lines tracking DMBQ concentration (Δ).  
 762 (B) *R. palustris* SA008.1.07 (black) and SA $\Delta$ van (red) both grow on benzoic acid (circles) and 4-  
 763 HBA (triangles). Solid lines are showing growth in Klett units and dashes are indicating aromatic  
 764 concentrations.

765 SUPPLEMENTARY FIGURES

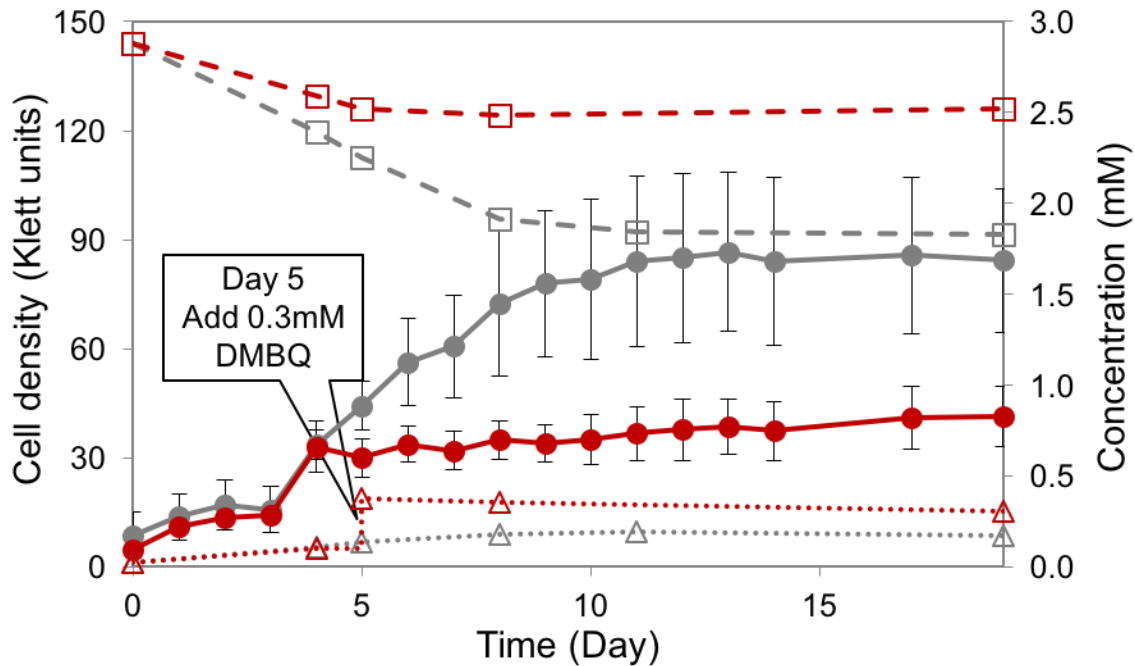

766

767 **Figure S1.** Effect of DMBQ addition on syringic acid degradation by *R. palustris* SA008.1.07.  
768 Solid lines show cell density (Klett units), dashes lines show syringic acid concentration, dotted  
769 lines show DMBQ concentration. Red lines indicate results for the DMBQ-containing culture and  
770 grey lines show results for a control culture not receiving DMBQ. DMBQ (0.3 mM) was added to  
771 the culture on Day 5. For this experiment, DMBQ was dissolved in DMSO, and the control culture  
772 was provided with DMSO only. Error bars represent standard deviation of experiments performed  
773 in triplicate.

774

775

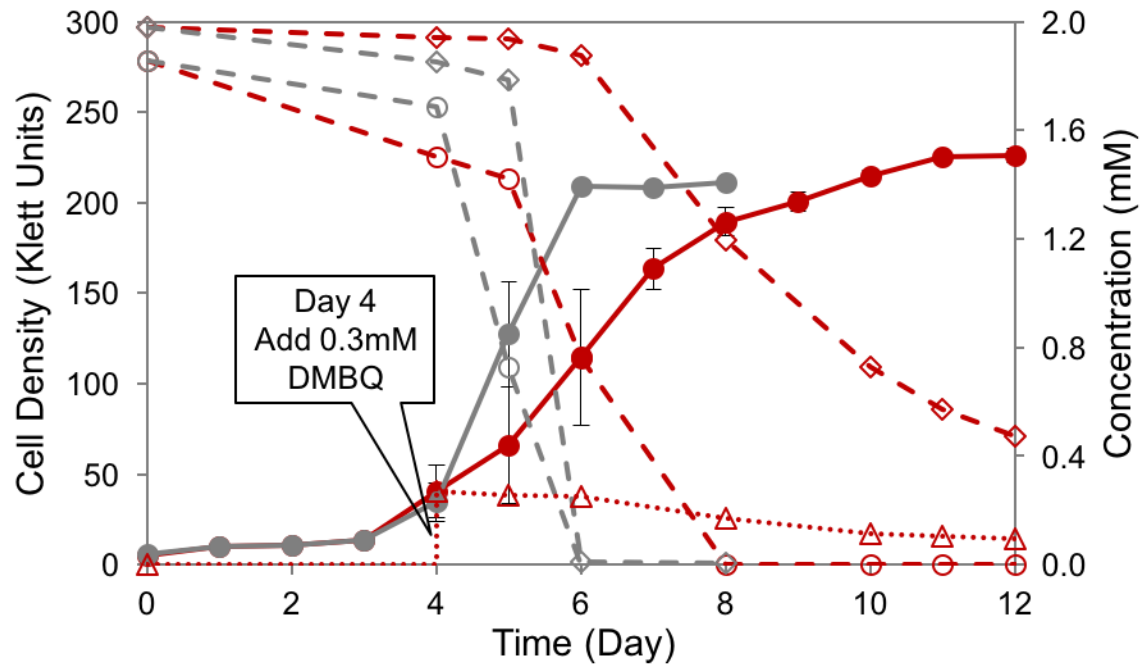

776

777

778

779

780

781

782

783

784

785

786

**Figure S2.** Effect of DMBQ addition on *R. palustris* SA008.1.07 growing on an equimolar amount of benzoic acid and 4-HBA (Initial concentration was 2 mM for each aromatic substrate). Solid lines are showing growth in Klett units (●), dashes tracking concentrations of benzoic acid (○), 4-HBA (◇), and dotted lines tracking DMBQ concentration (△). Red lines indicate results for the DMBQ-containing culture. DMBQ (0.3 mM) was added to the culture on Day 4. For this experiment, DMBQ was dissolved in DMSO. Parallel control cultures (in grey) received DMSO without DMBQ.

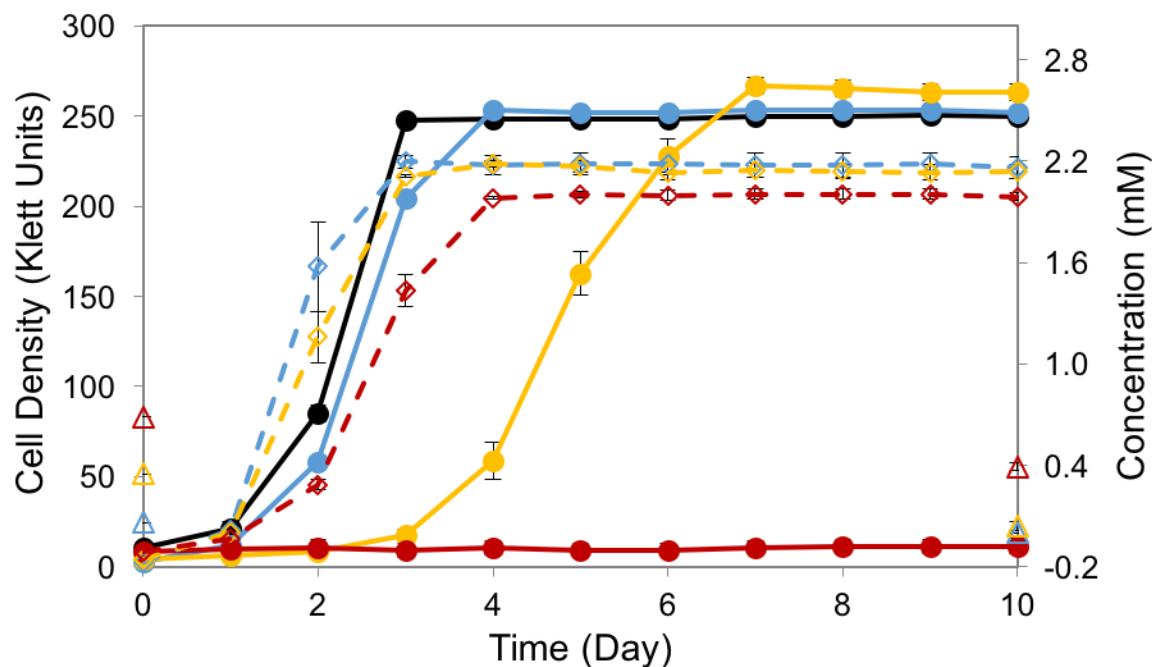

787

788 **Figure S3.** Effect of DMBQ on SA008.1.07 cultures grown on succinate. Solid lines show cell  
789 density of cultures received 10 mM succinate and various starting concentrations of DMBQ (black  
790 0 mM, blue 0.06 mM, yellow 0.3 mM, red 0.6 mM). For these experiments, DMBQ was dissolved  
791 in DMSO. Dashed lines are showing growth of control cultures received corresponding amount of  
792 DMSO without DMBQ. Triangles ( $\Delta$ ) denote concentrations of DMBQ at the beginning and end  
793 of the experiment.

794

795

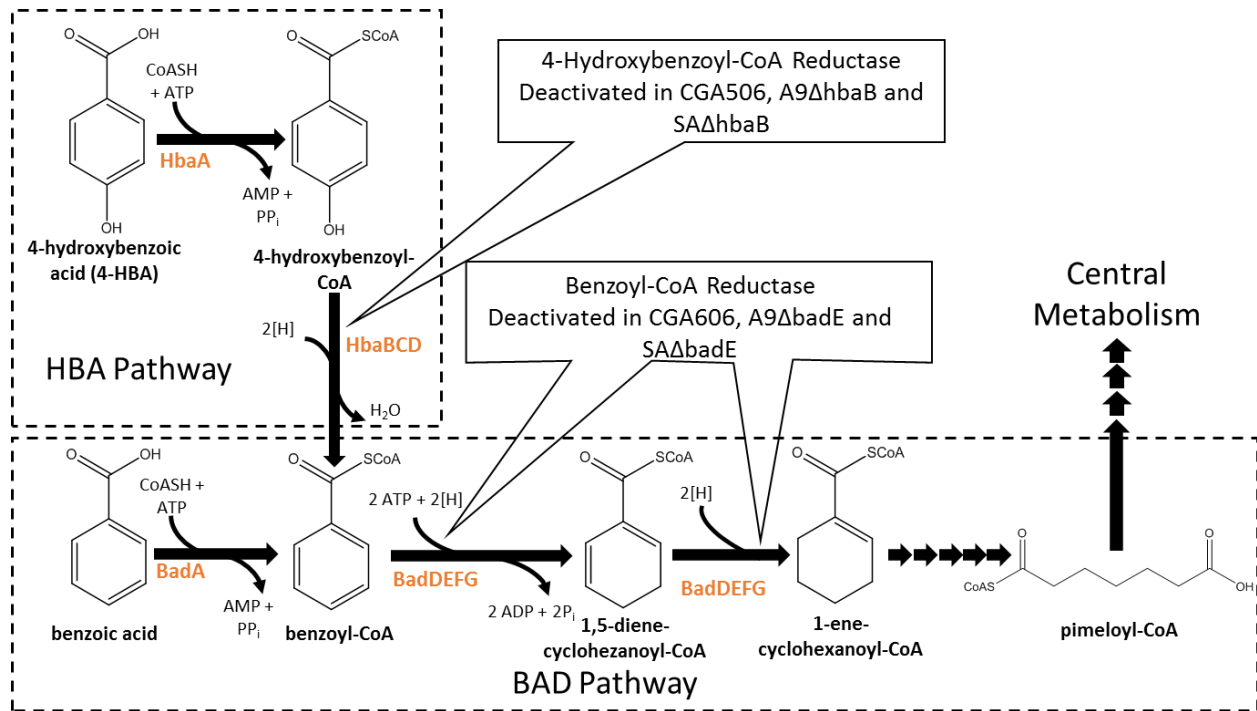

796

797 **Figure S4.** 4-Hydroxybenzoic acid (HBA) and benzoic acid degradation (BAD) pathways. These  
798 are the only previously established routes for anaerobic degradation of aromatic acids by *R.*  
799 *palustris*. HbaBCD and BadDEFG are oxygen sensitive enzymes.

800

801

802

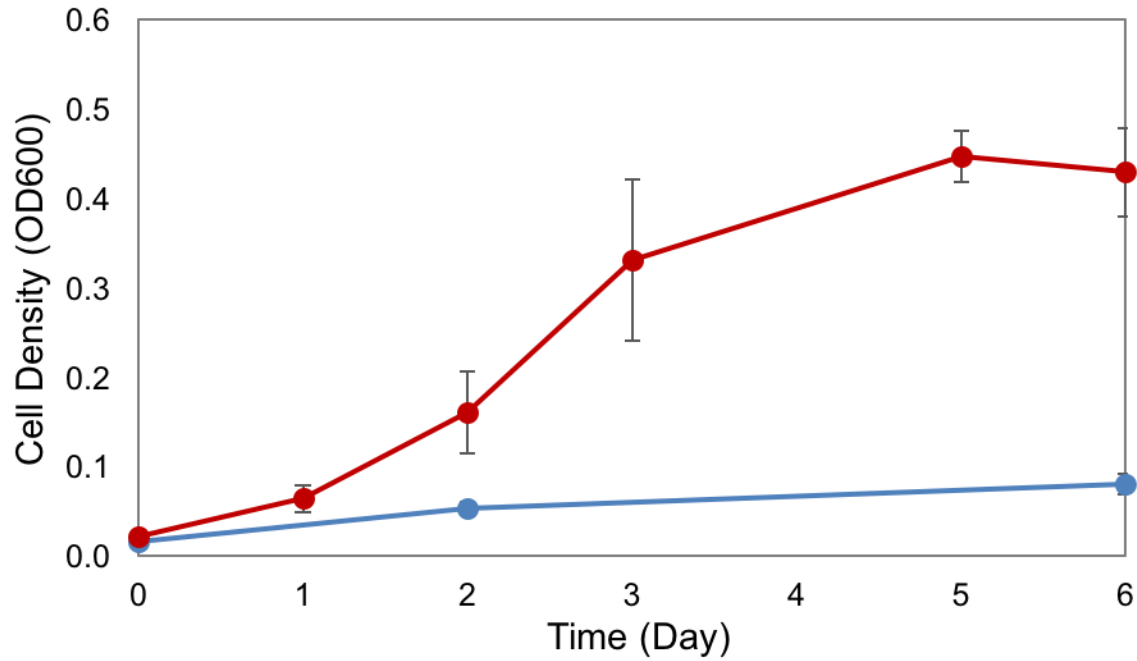

803

804 **Figure S5.** Aerobic growth of SA008.1.07 in 3 mM syringic acid (blue line) or vanillic acid (red  
805 line). At the end of experiment, syringic acid was not consumed, while vanillic acid was  
806 completely consumed.

807

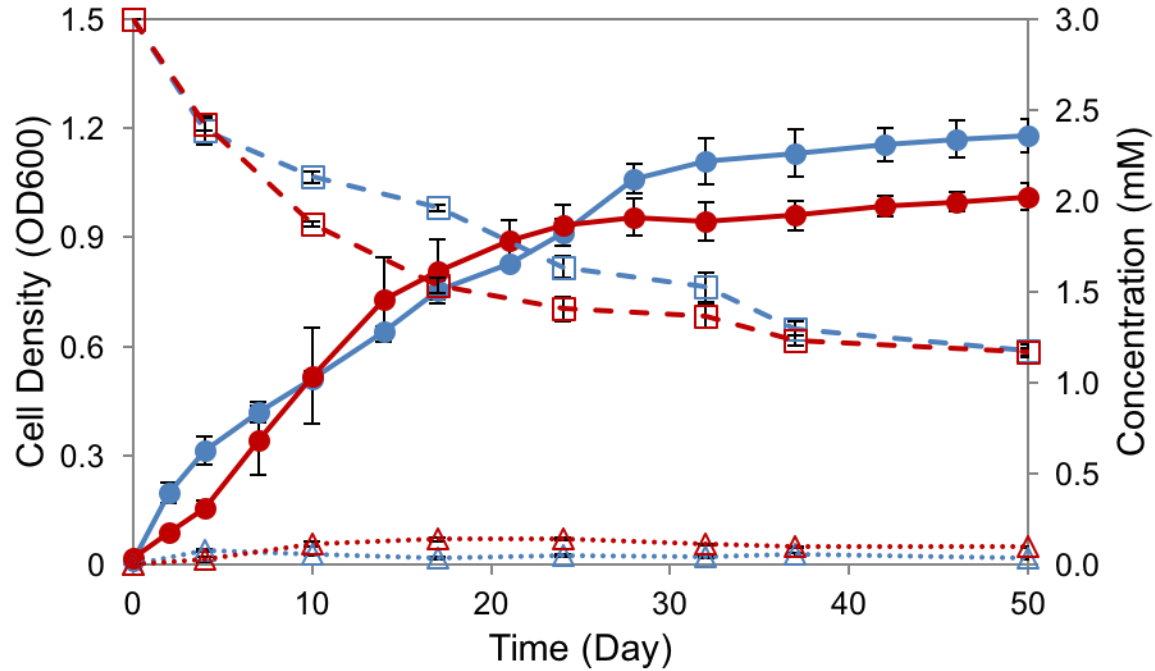

808

809 **Figure S6.** Cultures of SA008.1.07 in 3 mM syringic acid, grown on degassed (blue) and non-  
810 degassed (red) serum bottles. Solid lines are showing cell density in OD600 (●), dashes tracking  
811 concentrations of syringic acid (□), and dotted lines tracking DMBQ concentration (Δ).

812

813

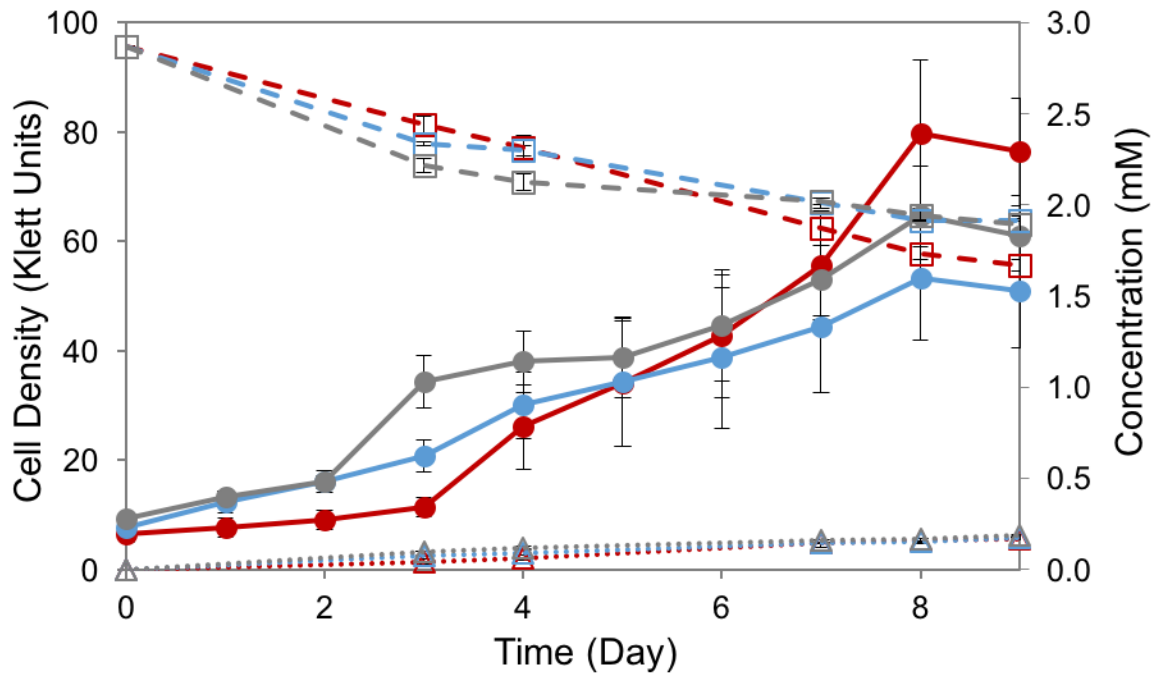

814

815 **Figure S7.** Cultures of *R. palustris* in 3 mM syringic acid. Growth and syringic acid consumption  
816 phenotype of SA008.1.07 (red) matches that of deletion strains SAΔ2160 (blue) and SAΔ4286  
817 (grey). The genes that were deleted in these strains *rpa2160* and *rpa4286* do not appear to be  
818 necessary for growth of SA008.1.07 on syringic acid. Solid lines are showing growth in Klett units  
819 (●), dashes tracking concentrations of syringic acid (□), and dotted lines tracking DMBQ  
820 concentration (Δ).

821



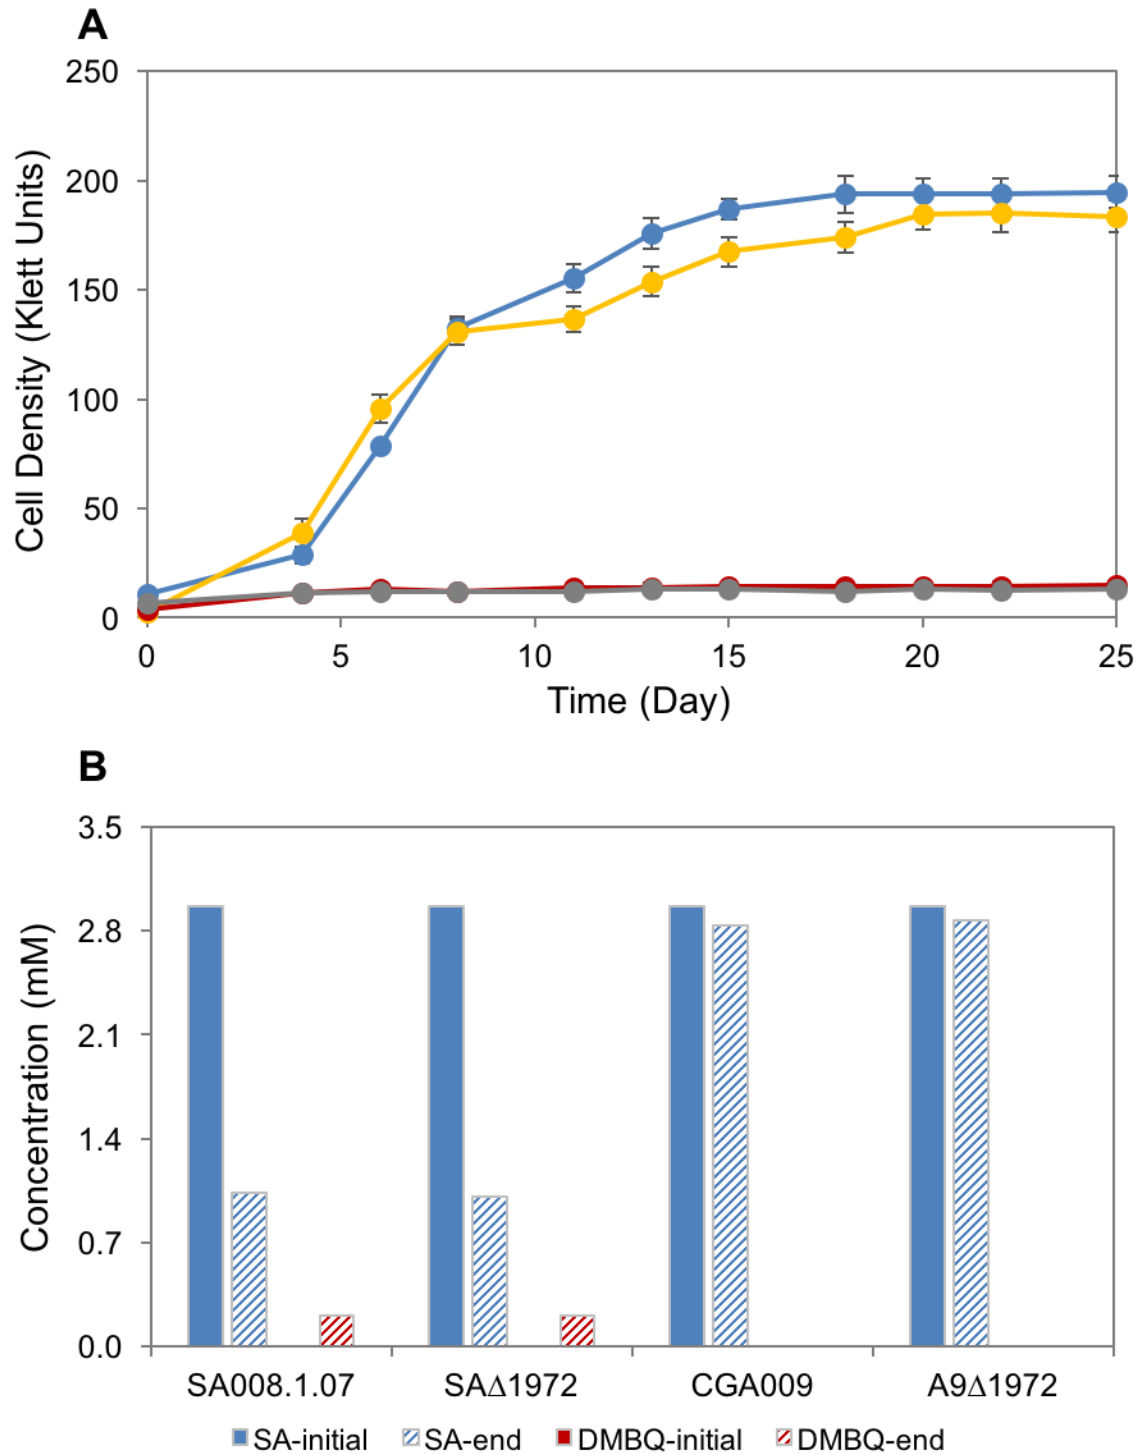

822

823 **Figure S8.** Cultures of *R. palustris* in 3 mM syringic acid. (A) Growth and syringic acid  
824 consumption phenotype of SA008.1.07 (blue) and CGA009 (red) matches that of deletion strains  
825 SA $\Delta$ 1972 (yellow) and A9 $\Delta$ 1972 (grey), respectively. (B) Concentration of syringic acid (SA,  
826 blue bars) and DMBQ (red bars) in the initial and end-point of the cultures.
